# Supplementary material for: Targeted degradation of aberrant tau in frontotemporal dementia patient-derived neuronal cell models
Source: PubMed Central journal article supplement (PMC6450673; doi:10.7554/elife.45457), 2019-03-25

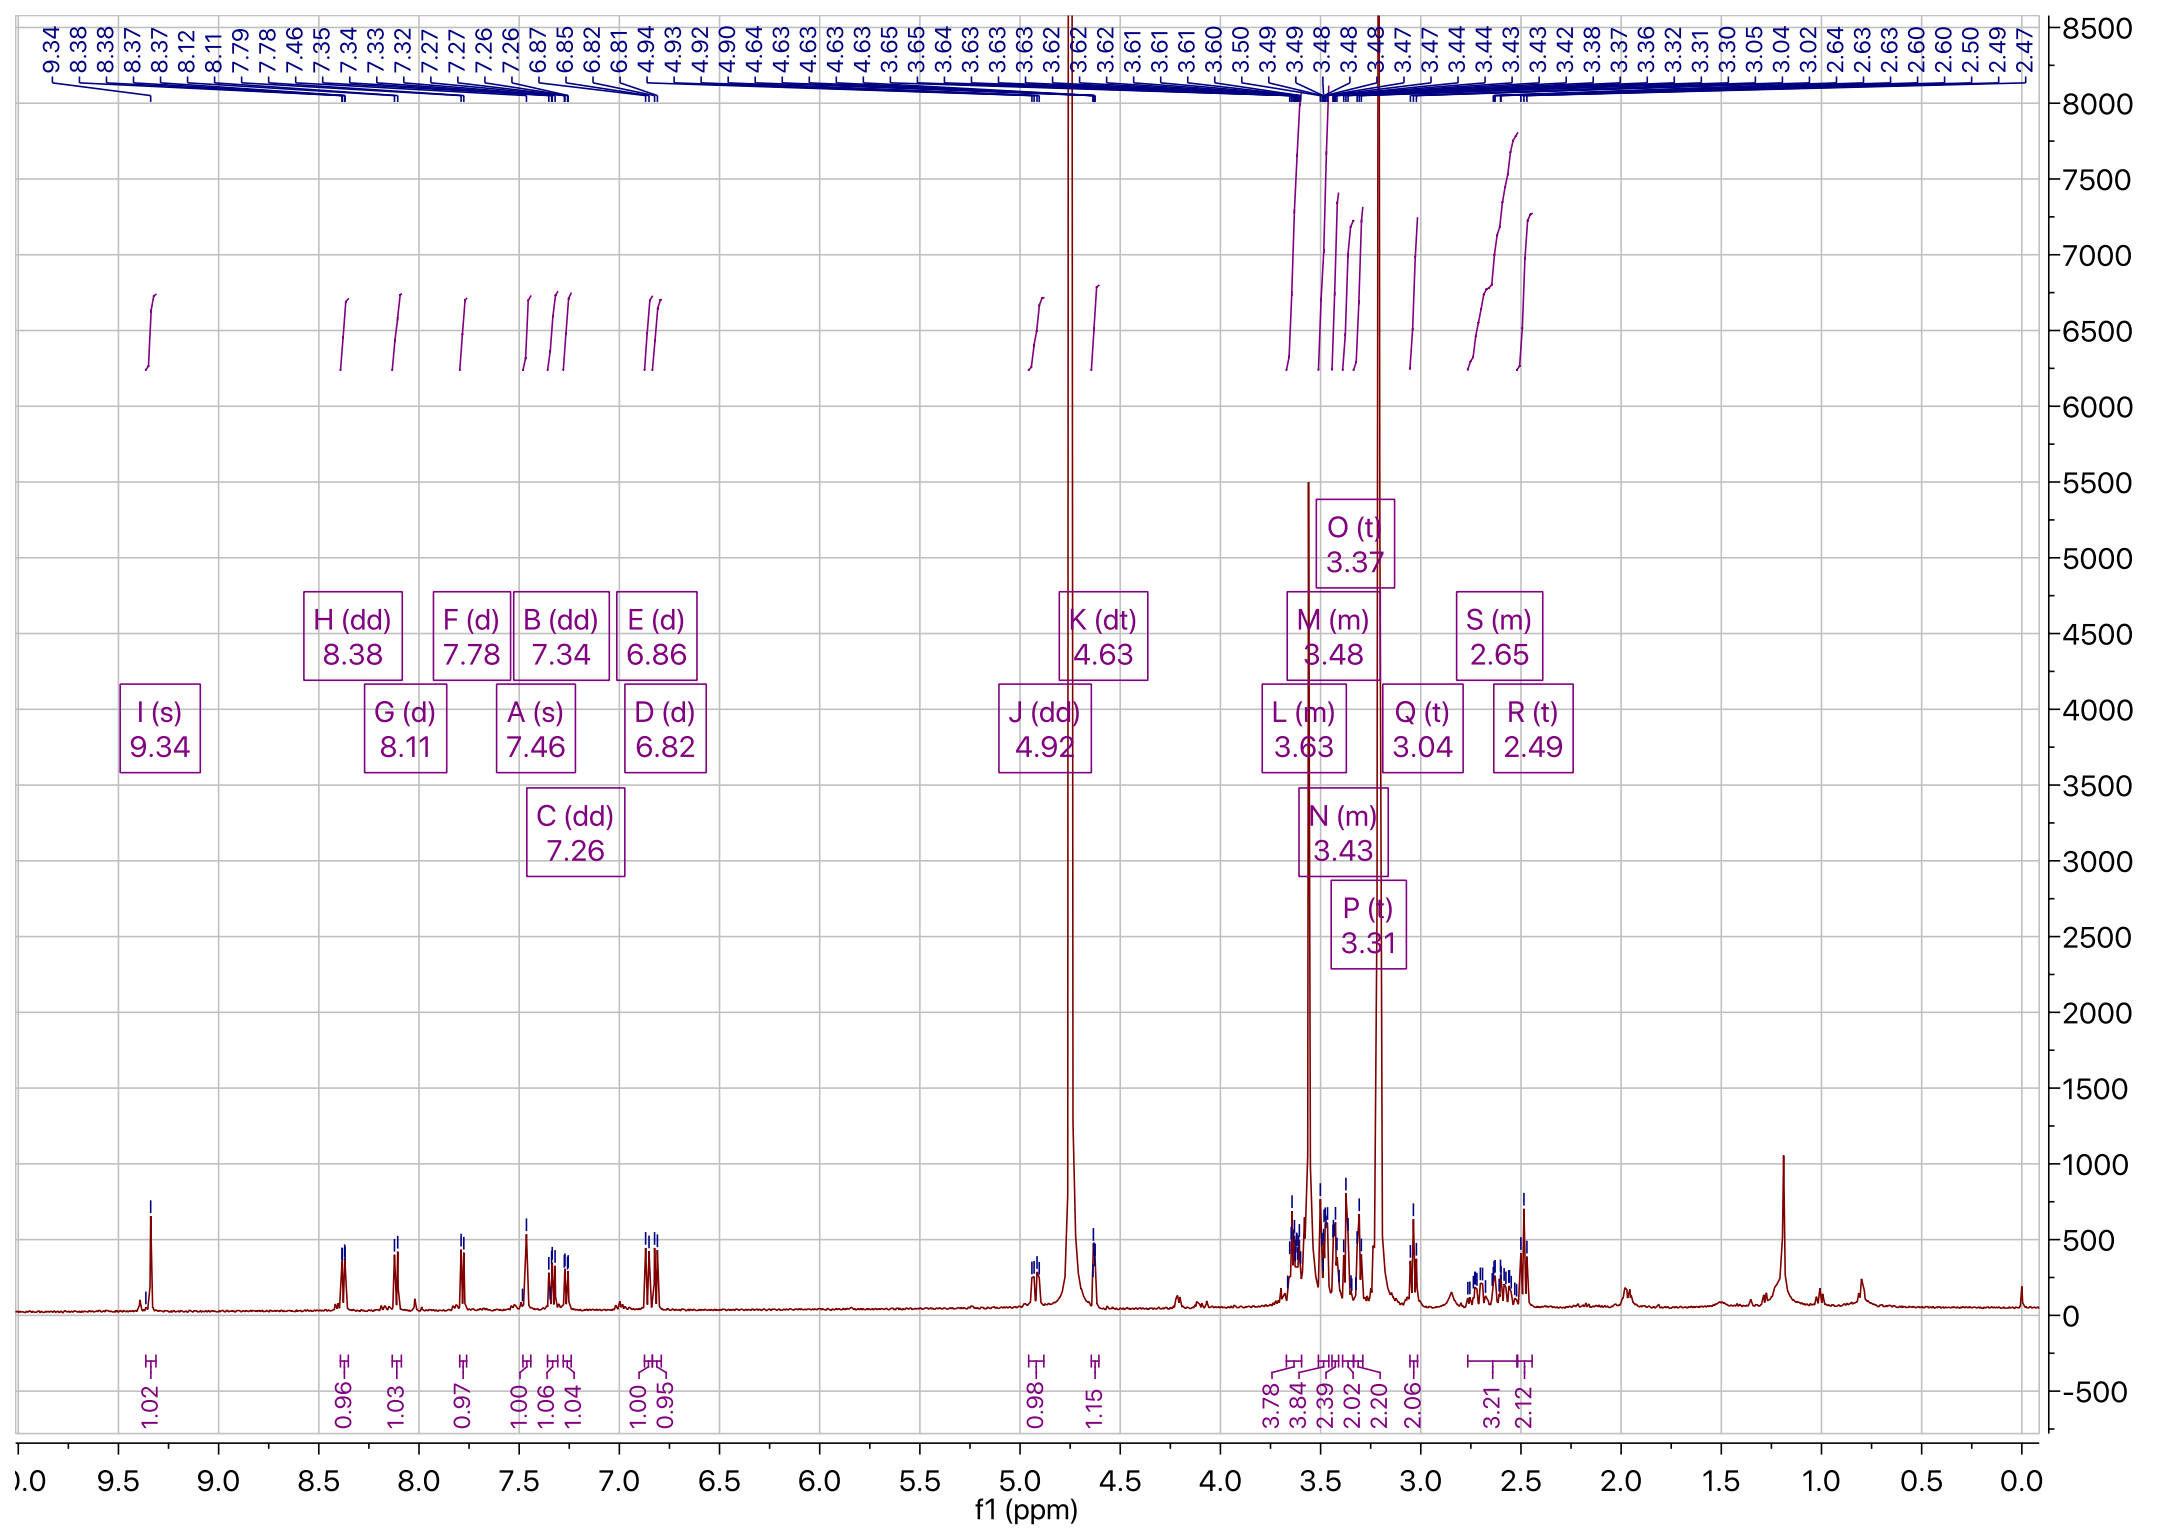

Supplement: elife-45457-supp1.pdf [file elife-45457-supp1.pdf]
