# Supplementary material for: Targeted degradation of aberrant tau in frontotemporal dementia patient-derived neuronal cell models
Source: PubMed Central journal article supplement (PMC6450673; doi:10.7554/elife.45457), 2019-03-25

05-Nov-2018 14:37:18

QC-01-175-1

3: Diode Array  
Range: 1.403e+2

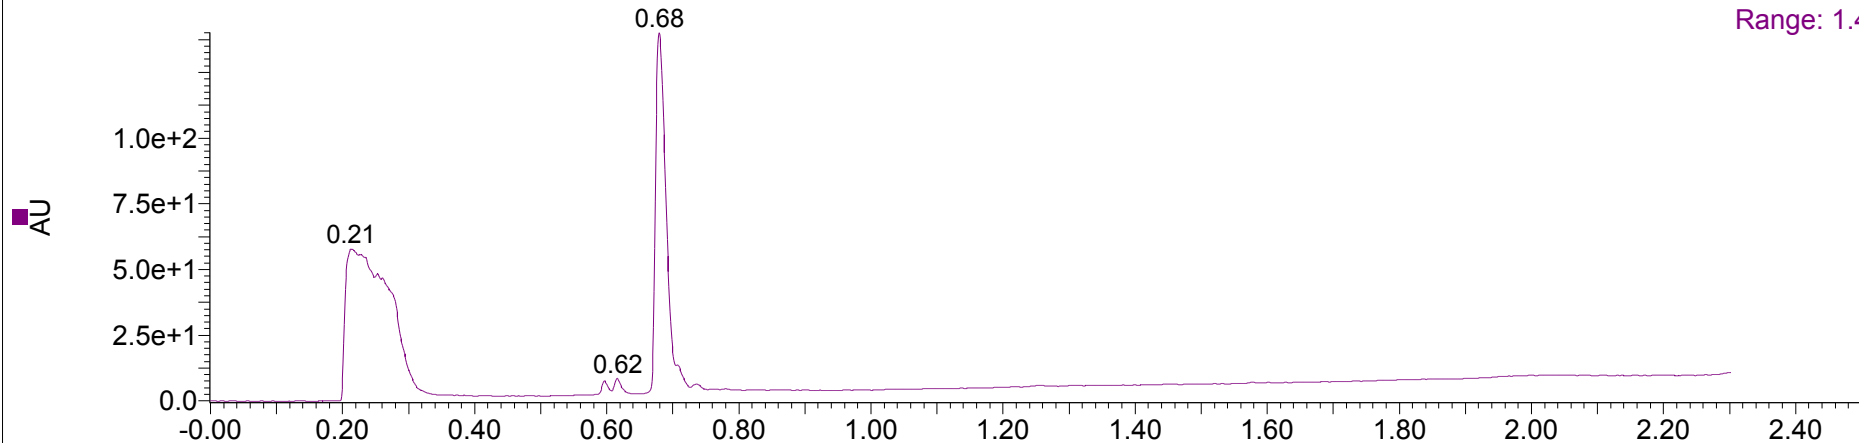

QC-01-175-1

2: Scan ES-  
TIC  
4.71e6

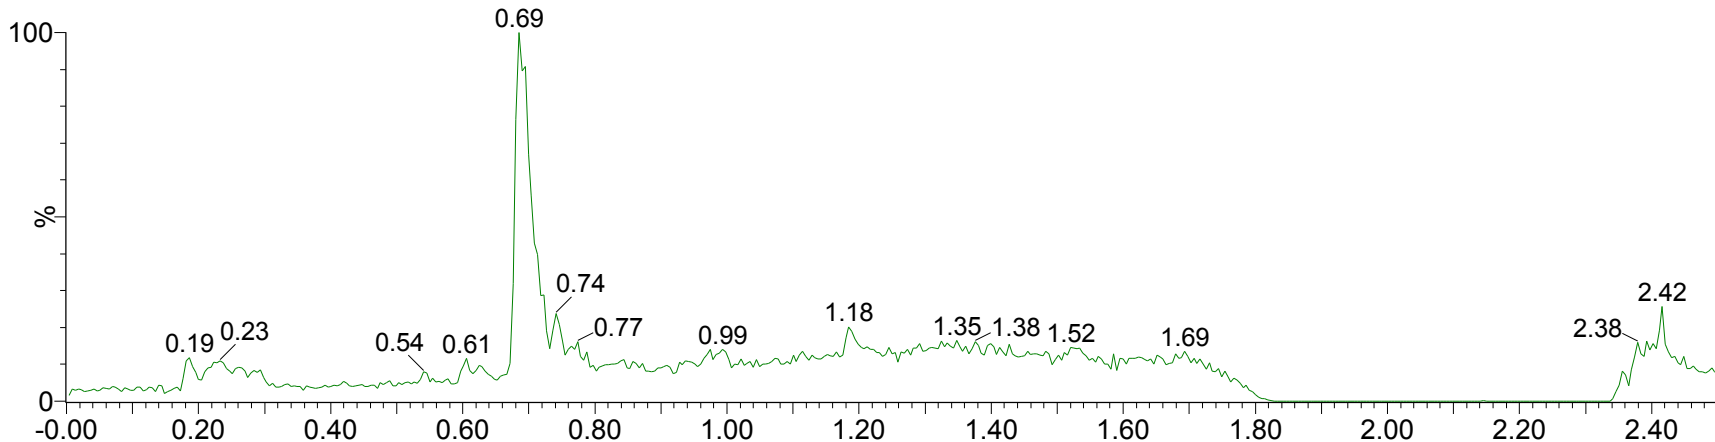

QC-01-175-1

1: Scan ES+  
TIC  
9.93e7

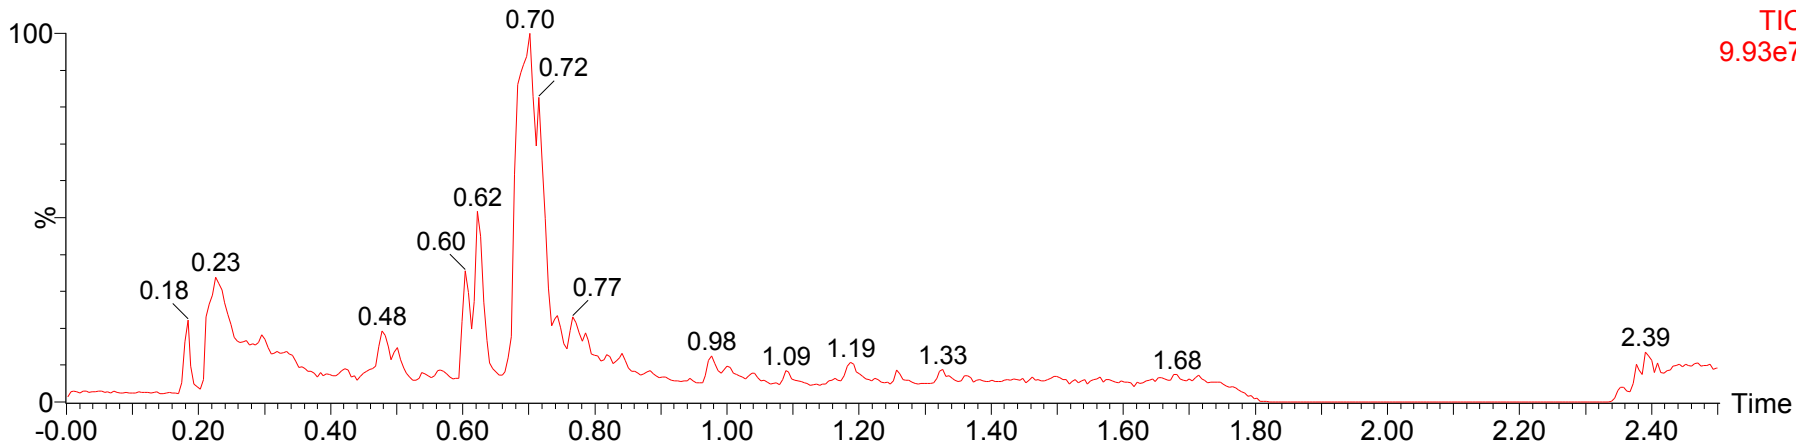

QC-01-175-1 149 (0.692)

1: Scan ES+  
5.14e7

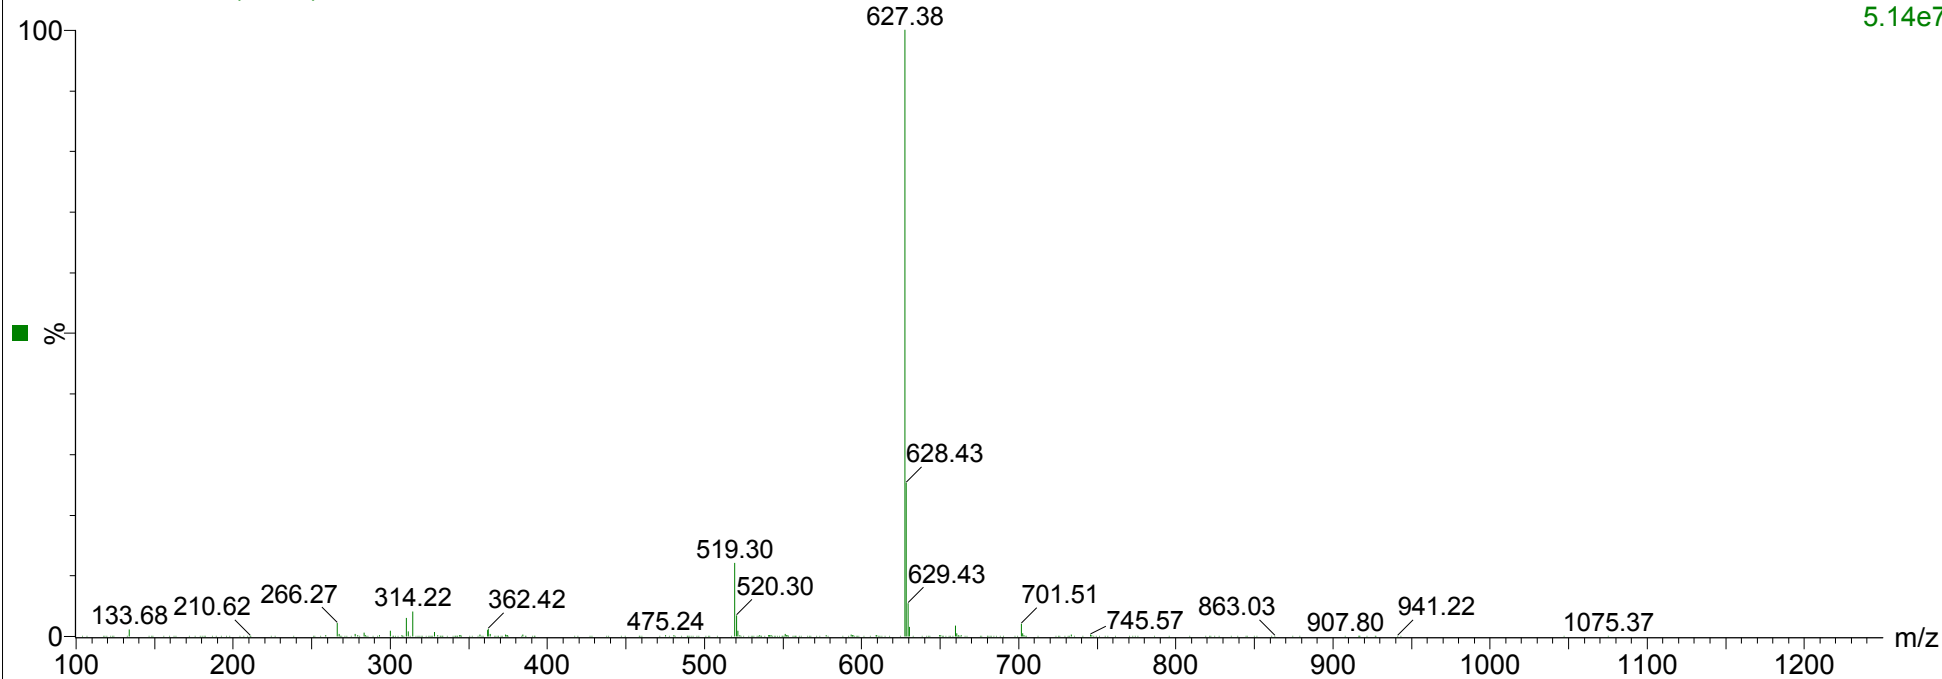

QC-01-175-1 151 (0.704)

2: Scan ES-  
1.16e6

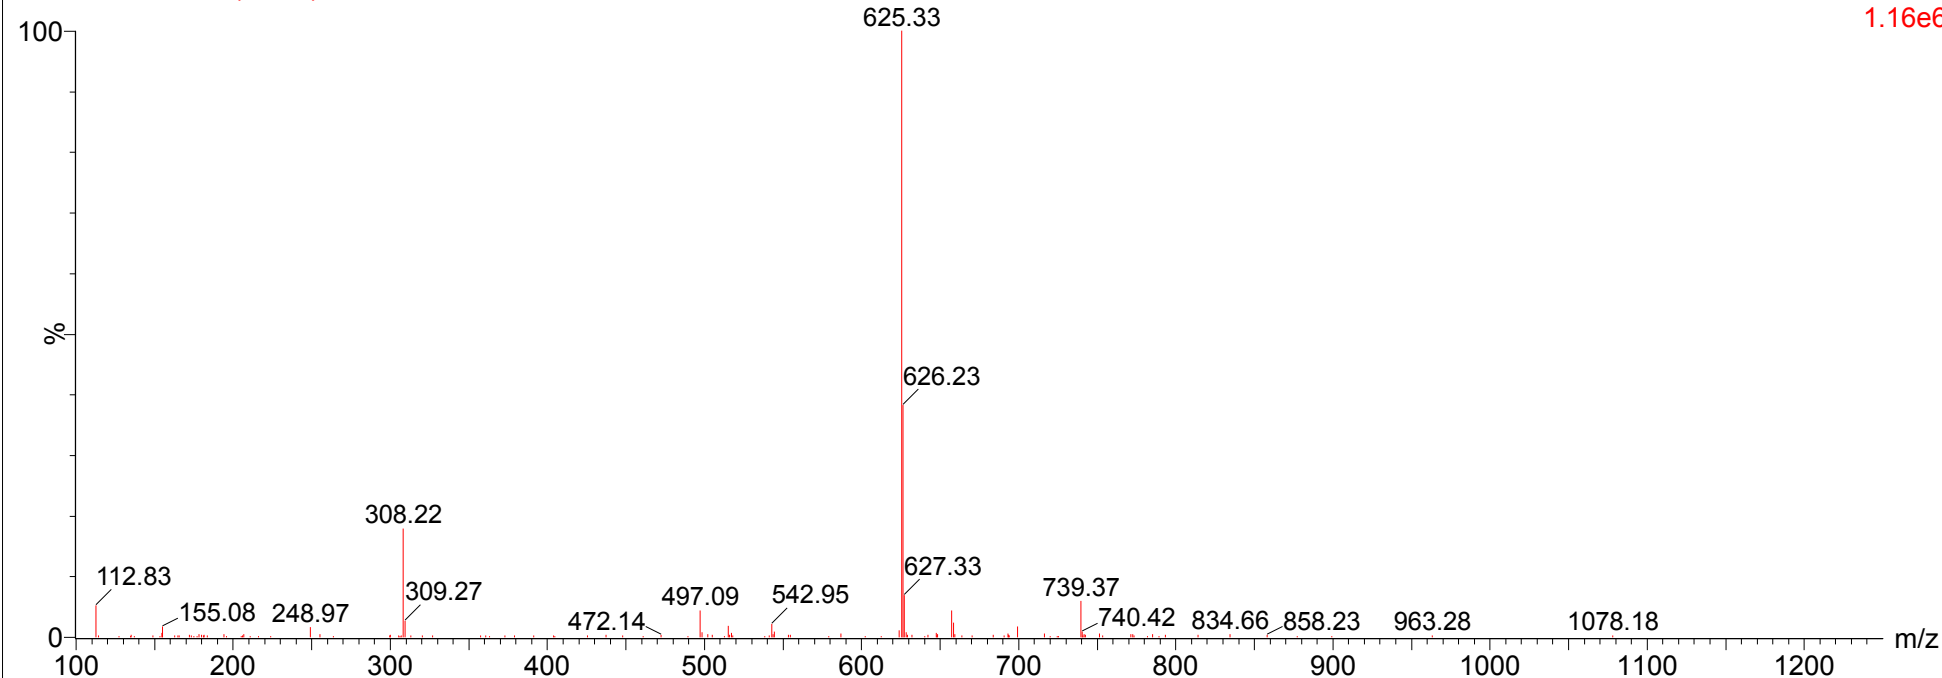

Supplement: elife-45457-supp3.pdf [file elife-45457-supp3.pdf]
