# Supplementary material for: Targeted degradation of aberrant tau in frontotemporal dementia patient-derived neuronal cell models
Source: PubMed Central journal article supplement (PMC6450673; doi:10.7554/elife.45457), 2019-03-25

05-Mar-2019 14:14:27

QC-03-075-1

3: Diode Array  
Range: 2.939e+2

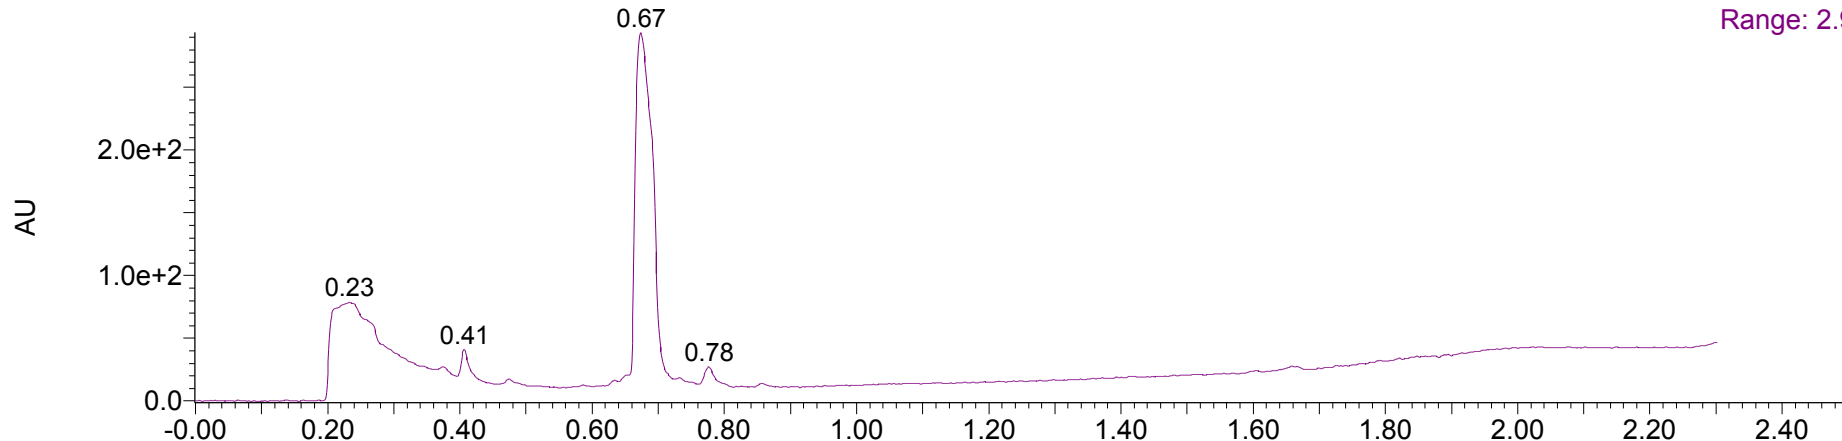

QC-03-075-1

2: Scan ES-  
TIC  
5.94e5

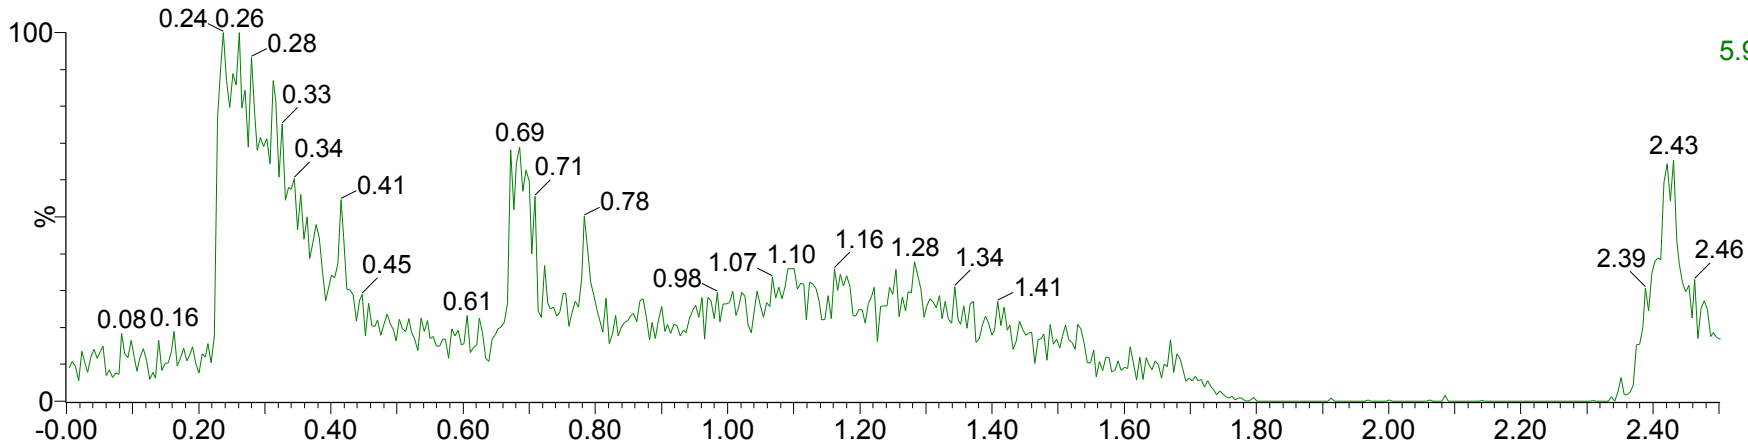

QC-03-075-1

1: Scan ES+  
TIC  
1.44e7

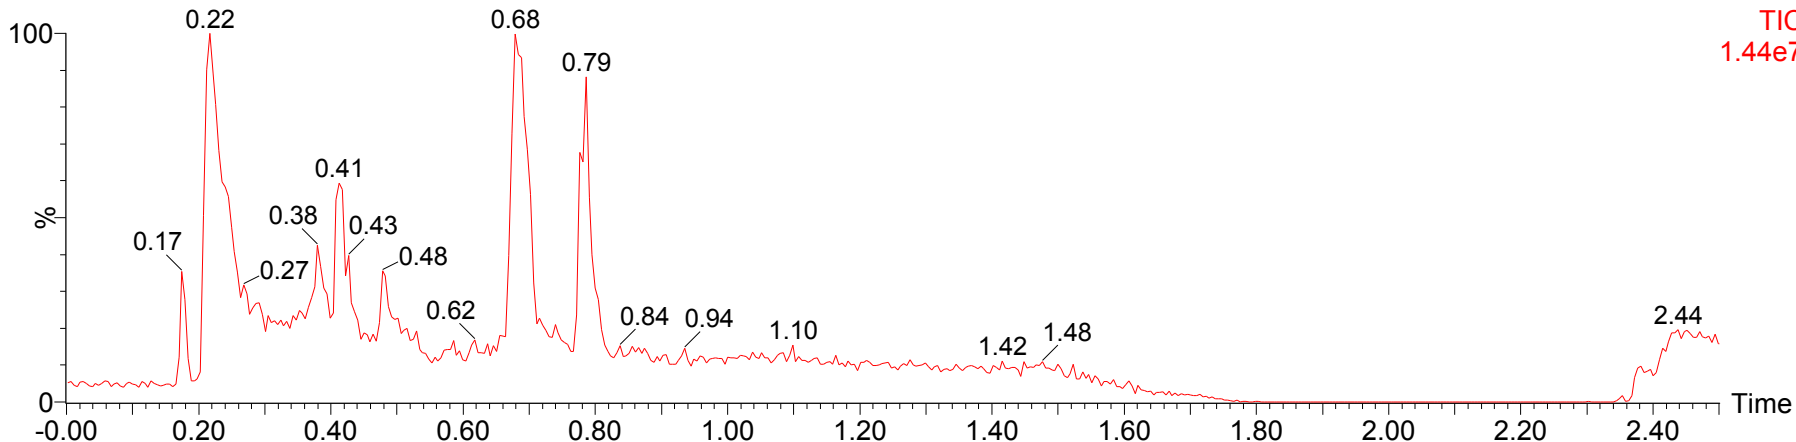

QC-03-075-1 147 (0.683)

1: Scan ES+  
1.03e7

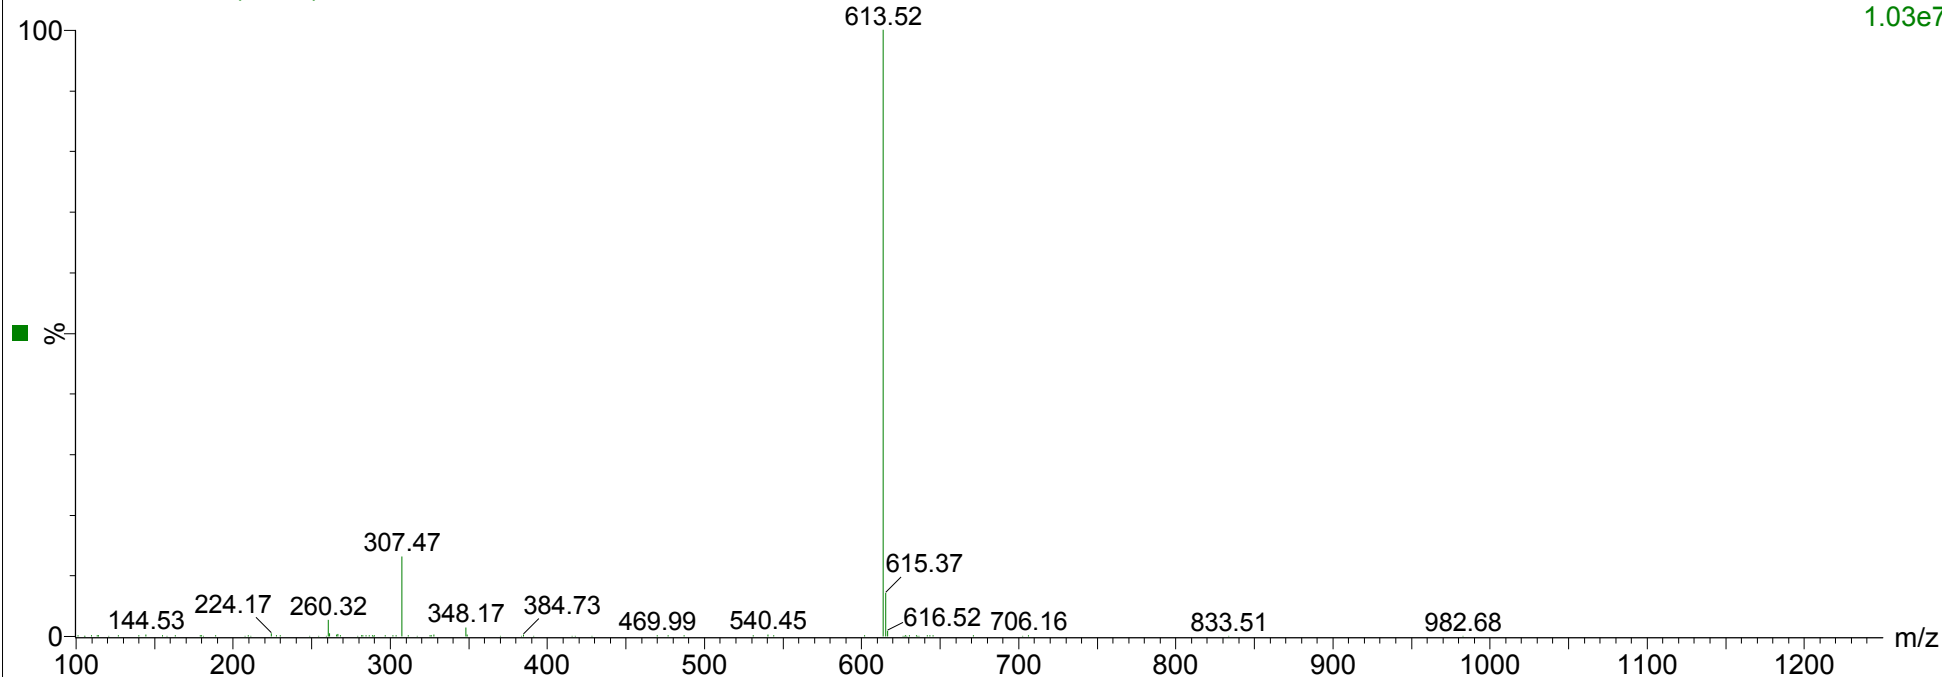

QC-03-075-1 146 (0.681)

2: Scan ES-  
2.58e5

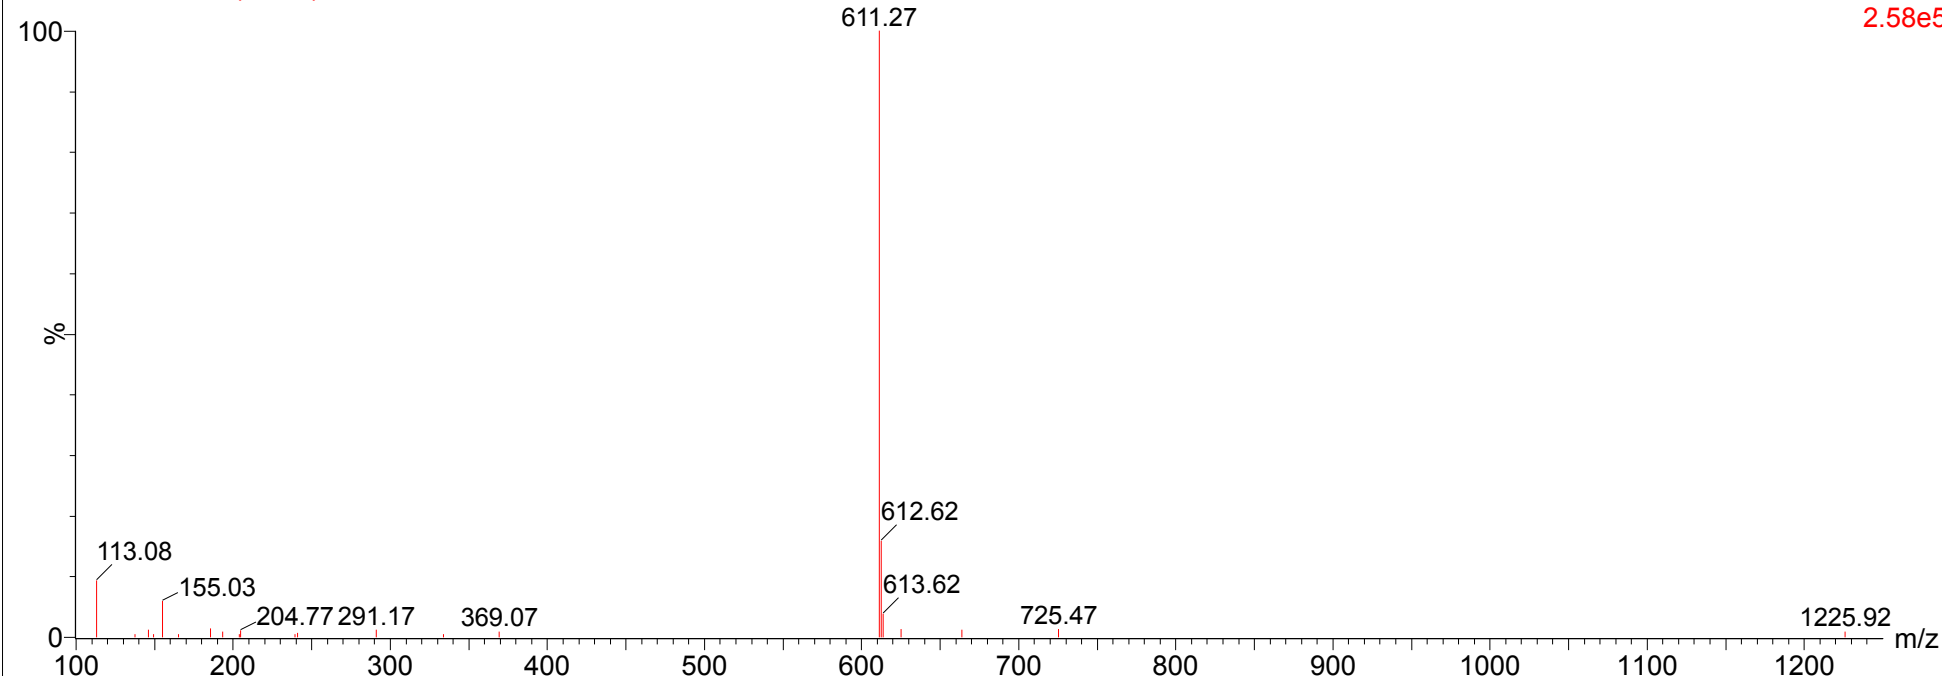

Supplement: elife-45457-supp4.pdf [file elife-45457-supp4.pdf]
