# Supplementary material for: Targeted degradation of aberrant tau in frontotemporal dementia patient-derived neuronal cell models
Source: eLife journal article supplement (doi:10.7554/elife.45457), 2019-03-25
Supplement: supp [file elife-45457-supp-v1.zip]

Archive with 11 entries (11 files):
- elife_poa_e45457_Figure_5_source_data_1.xlsx
- elife_poa_e45457_Figure_2_source_data_1.xlsx
- elife_poa_e45457_Figure_2_source_data_2.xlsx
- elife_poa_e45457_Figure_1_figure_supplement_2.tif
- elife_poa_e45457_Figure_2_figure_supplement_2.tif
- elife_poa_e45457_Transparent_Reporting_File.pdf
- elife_poa_e45457_Figure_3_figure_supplement_1.tif
- elife_poa_e45457_Figure_1_figure_supplement_1.tif
- elife_poa_e45457_Figure_2_figure_supplement_1.tif
- elife_poa_e45457_Figure_7_source_data_1.xlsx
- elife_poa_e45457_Figure_5_figure_supplement_1.tif
