# Supplementary material for: Targeted degradation of aberrant tau in frontotemporal dementia patient-derived neuronal cell models
Source: eLife journal article supplement (doi:10.7554/elife.45457), 2019-03-25
Supplement: supp [file elife-45457-supp-v1.zip › elife_poa_e45457_Figure_2_source_data_1.xlsx]

## Sheet: Figure 2-Source data 1
Figure 2-source data 1. Human neural cell lines derived from tauopathy-affected (progressive supranuclear palsy, PSP or behavioral variant of FTD, bvFTD) and age-matched unaffected individuals, and MAPT KO line employed in this study. +/- refers to heterozygous variant carriers.
Donor	Clinical	Tau	Cell Line	Reference
Male, 60s	Unaffected Control (1)	Non-mutant	8330-8-RC1	Silva 2016
Female, 40s	Unaffected Control (2)	Non-mutant	MGH2069-RC1	Manuscript in preparation
				Seo 2017
Male, 50s	Unaffected Control (3)	Non-mutant	CTR2-L17-RC2	Almeida 2012
				Silva 2016
Male, 60s	PSP	A152T (+/-)	FTD19-L5-RC6	Silva 2016
Male, 60s	(PSP)	MAPT KO	FTD19-L5-RC6;MAPT KO	Silva 2016
Female, 50s	bvFTD	P301L (+/-)	MGH2046-RC1	Manuscript in preparation
				Seo 2017
