# Supplementary material for: Targeted degradation of aberrant tau in frontotemporal dementia patient-derived neuronal cell models
Source: eLife journal article supplement (doi:10.7554/elife.45457), 2019-03-25
Supplement: supp [file elife-45457-supp-v1.zip › elife_poa_e45457_Figure_2_source_data_2.xlsx]

## Sheet: A152T ELISA
Compound treatment, 24 h																										T-test relative to Vehicle
QC-01-175 (μM)	TAU5												S396 P-Tau													TAU5		S396
0	1	1.11	0.55	0.45	0.85	0.98	1	1	1	1	1	1	1	0.92	1.06	1.32	1.26	0.96	1	1	1	1	1	0.98
0.001	1.12	1.35	0.67	0.54	1.03	1.18	1.08	1.3	0.65	0.52	1	1.14	1	0.92	1.06	1.32	0.77	1	0.77	0.62	0.71	0.89	0.85	0.95		0.608604	ns	0.0499259	ns
0.01	1	1.21	0.6	0.49	0.93	1.06	1.12	1.35	0.67	0.55	1.04	1.19	0.65	0.6	0.68	0.86	0.82	0.62	0.72	0.66	0.76	0.95	0.9	0.69		0.826182	ns	9.06387e-06	****
0.05	0.96	1.16	0.57	0.47	0.89	1.02	1.06	1.28	0.63	0.52	0.98	1.12	0.53	0.49	0.56	0.71	0.67	0.51	0.6	0.55	0.63	0.79	0.75	0.58		0.81391	ns	1.80815e-08	****
0.1	1.12	1.35	0.67	0.54	0.2	1.18	0.87	0.57	0.67	0.54	1.03	1.18	0.52	0.48	0.55	0.69	0.66	0.5	0.58	0.53	0.61	0.76	0.73	0.55		0.470829	ns	7.25172e-09	****
0.5	0.89	0.61	0.53	0.43	0.82	0.94	0.93		0.55	0.45	0.86	0.98	0.46	0.42	0.48	0.6	0.57	0.44	0.33	0.31	0.35	0.44	0.42	0.32		0.014974	**	3.10886e-11	****
1	0.57	0.69	0.34	0.28	0.53	0.61	0.75		0.45	0.36	0.69	0.79	0.31	0.29	0.33	0.42	0.4	0.3	0.38	0.35	0.4	0.51	0.48	0.37		0.000165912	****	1.35183e-12	****
10	0.33	0.26	0.5	0.4	0.36	0.28	0.31		0.43	0.35	0.66	0.16	0.27	0.25	0.29	0.36	0.34	0.26	0.33	0.31	0.35	0.44	0.42	0.32		6.24226e-07	****	1.88287e-13	****
Compound treatment, 24 h																			T-test relative to Vehicle
QC-03-075 (μM)	TAU5								S396 P-Tau										TAU5		S396
0	0.85	0.98	1	1	1	1	0.99	0.9777	1	0.92	1.06	1.32	1.26	0.96	1	1.02
0.001	1.12	1.35	0.97	0.99	1.03	1.18	0.957696	1.12657	0.74	0.93	0.88	0.82	1.06	1	0.957697	1.04			0.0549764	ns	0.0527852	ns
0.01	0.98	1.05	0.92	1	0.91	0.92	0.9587	1.00003	0.73	0.92	0.87	0.81	1.05	0.99	0.96	0.91			0.808997	ns	0.773567	ns
0.05	1.15	1.39	0.69	1	1.06	1.22	0.99798	1.215	0.69	0.87	0.82	0.76	0.99	0.93	0.99	1.19999			0.281566	ns	0.0521498	*
0.1	1.2	1.15	1.02	1	1.11	1.07	0.9	1.3	0.7	0.88	0.83	0.77	1	0.94	0.8539	0.91			0.033665	*	0.033665	*
0.5	1.09	1.31	0.65	1	1.01	1.15	0.79589	1.09999	0.79	0.99	0.94	0.88	1.13	1.07	1	0.9999			0.511778	ns	0.623229	ns
1	1.05	1.27	0.63	0.81	0.97	1.11	1.1	0.89	0.89	1.12	1.06	0.99	1.28	1.2	0.8546	1			0.986459	ns	0.957252	ns
10	0.86	1.04	0.92	0.82	0.8	0.91	0.876	0.894657	0.71	0.89	0.84	0.79	1.01	0.96	1.01924	0.87			0.0931992	ns	0.0198496	*

## Sheet: Controls ELISA
Control 1, 8330-8-RC1 (24h)										T-test relative to Vehicle
QC-01-175 (μM)	TAU5				S396 P-Tau					TAU5		S396
0	1	0.95	1	1	1	1.09	1	1
0.001	1.03	0.98	1.2	1.01	0.9	1.07	1	0.99999		0.233608	ns	0.497737	ns
0.01	0.91	0.87	0.967999	1	0.97	0.67	0.89987	0.967		0.161727	ns	0.0973136	ns
0.1	0.93	1.07	0.97	0.84	0.71	0.84	1.21	0.901		0.504273	ns	0.360581	ns
1	0.99	0.94	0.95	0.71	0.85	1.01	0.8	0.95		0.213276	ns	0.0625308	ns
10	0.74	1	0.91	0.86	0.55	0.65	0.77	0.86		0.0954215	ns	0.00454141	**
Control 3, CTR2-L17-RC2 (24h)										T-test relative to Vehicle
QC-01-175 (μM)	TAU5				S396 P-Tau					TAU5		S396
0	1	0.89	1	1	1	0.83	1	1
0.001	1.1	1.07	0.99	1.31	0.94	0.77	0.84	1		0.0962274	ns	0.333392	ns
0.01	0.96	1.12	1	0.89999	1.06	1.13	1	0.97		0.691387	ns	0.186221	ns
0.1	1.08	0.96	0.93	1	0.95	0.78	1	0.899		0.655103	ns	0.458783	ns
1	0.91	0.81	0.71	0.95	1.03	0.85	0.87	0.72		0.0792634	ns	0.283725	ns
10	0.93	0.83	1.17	0.95	0.7	0.95	0.89	0.74		0.975069	ns	0.109342	ns
Control 2, MGH2069-RC1 (24h)										T-test relative to Vehicle
QC-01-175 (μM)	TAU5				S396 P-Tau					TAU5		S396
0	1	1.03	1	0.99	1	1.18	1	1
0.001	0.91	0.93	1	1.15	0.71	0.83	1.11	0.91		0.896101	ns	0.474241	ns
0.01	0.82	0.85	0.89	0.99	0.89	1.05	1.1	0.99		0.0214448	*	0.577852	ns
0.1	0.76	0.78	0.92	0.71	0.85	1	0.99	1.3		0.00354258	**	0.927144	ns
1	0.87	0.89	0.98	0.78	1.14	1.04	0.97	1.14		0.0246054	*	0.669059	ns
10	0.71	0.83	0.74	0.76	0.95	1.12	0.78	0.91		9.8967e-05	***	0.254374	ns

## Sheet: P301L ELISA
	Compound treatment, 24 h																										T-test relative to Vehicle
	QC-01-175 (μM)	TAU5												S396 P-Tau													TAU5		S396
	0	1	0.95	0.59	0.97	0.72	0.69	1	1	1	1	1	1	1	0.97	0.89	1.02	0.84	1	1	1	1	1.2	1	1
	0.001	0.73	0.69	1	0.34	1	1	1	0.95	0.89	0.87	0.72	0.69	0.69	1	0.62	0.7	0.58	0.77	0.75	0.89	0.79	0.65	0.9	0.77		0.241689	ns	8.17192e-05	***
	0.01	0.69	0.66	0.41	0.32	0.5	0.48	0.73	0.7	0.43	0.34	0.53	0.51	0.69	0.67	0.61	0.7	0.98	0.73	0.71	0.65	0.75	0.62	0.97	0.81		1.67363e-06	****	0.000644183	***
	0.05	0.56	0.53	0.33	0.26	0.4	0.39	0.55	0.52	0.32	0.26	0.39	0.38	0.43	0.42	0.38	0.44	0.36	0.41	0.4	0.36	0.42	0.34	0.39	0.71		3.80005e-09	****	5.88581e-16	****
	0.1	0.55	0.52	0.33	0.26	0.4	0.38	0.71	0.68	0.42	0.34	0.52	0.5	0.43	0.41	0.38	0.43	0.36	0.43	0.42	0.39	0.44	0.36	0.34	0.44		1.67455e-07	****	4.82573e-16	****
	0.5	0.52	0.5	0.31	0.25	0.38	0.36	0.63	0.6	0.37	0.3	0.46	0.44	0.32	0.31	0.28	0.32	0.27	0.34	0.33	0.31	0.35	0.29	0.31	0.23		1.39275e-08	****	1.94747e-17	****
	1	0.43	0.41	0.26	0.2	0.31	0.3	0.55	0.52	0.33	0.26	0.4	0.38	0.34	0.33	0.3	0.35	0.29	0.34	0.33	0.3	0.35	0.29	0.33	0.49		6.93804e-10	****	2.2092e-17	****
	10	0.41	0.39	0.25	0.2	0.3	0.29	0.54	0.51	0.32	0.25	0.39	0.37	0.76	0.74	0.68	0.77	0.64	0.67	0.65	0.68	0.59	0.73	0.41	0.38		4.23791e-10	****	2.81242e-09	****
	Compound treatment, 24 h																		T-test relative to Vehicle
	QC-03-075 (μM)	TAU5								S396 P-Tau									TAU5		S396
	0	1	0.95	1	0.97	0.72	0.69			1	0.97	0.89	1.02	0.84	1
	0.001	1.36	1.29	0.81	0.64	0.98	0.94			0.8	0.78	0.92	0.82	0.98	0.91				0.38769	ns	0.141113	ns
	0.01	1.08	1.03	0.64	0.51	0.78	0.75			0.78	0.75	0.69	0.79	0.95	0.71				0.422213	ns	0.0246232	*
	0.05	1.04	0.99	0.62	0.49	0.75	0.72			0.74	0.82	0.66	0.76	0.92	0.72				0.277947	ns	0.0178297	*
	0.1	0.98	0.93	0.58	0.46	0.71	0.68			0.87	0.74	0.68	0.98	0.64	0.75				0.132011	ns	0.0535707	ns
	0.5	1.24	1.35	1.15	0.91	0.94	1.35			1.03	1	0.92	1.05	0.87	1				0.0216726	*	0.55173	ns
	1	1.01	1.13	1.02	0.81	1.24	1.19			1.08	1.05	0.97	1.1	0.91	1				0.0657698	ns	0.152975	ns
	10	1.05	1	0.62	0.49	0.76	0.73			0.64	0.62	0.57	0.65	0.54	0.69				0.309948	ns	0.00289298	***
