# Supplementary material for: Targeted degradation of aberrant tau in frontotemporal dementia patient-derived neuronal cell models
Source: eLife journal article supplement (doi:10.7554/elife.45457), 2019-03-25
Supplement: supp [file elife-45457-supp-v1.zip › elife_poa_e45457_Figure_5_source_data_1.xlsx]

## Sheet: A152T, 4h Treat.
	Compound treatment, 4 h																		T-test relative to Vehicle
	QC-01-175 (μM)	TAU5								S396 P-Tau									TAU5		S396
	0	1	1.2	0.6	0.89	0.92	1.06	1.08	0.92	1	0.92	1.06	1.32	1.26	0.96	1	0.98
	0.001	0.68	0.82	0.41	0.33	0.63	0.72			0.98	0.9	1.03	1.29	1.23	0.94				0.00330471	**	0.992104	ns
	0.01	0.83	1	0.49	0.4	0.76	0.87	0.79	0.84	0.82	0.75	0.86	1.08	1.03	0.78	0.81	0.97		0.0429675	*	0.0216088	*
	0.05	0.87	1.05	0.52	0.42	0.8	0.92			0.75	0.69	0.79	0.99	0.94	0.72				0.107076	ns	0.0056921	**
	0.1	0.18	0.22	0.11	0.09	0.17	0.19	0.38	0.43	0.18	0.16	0.19	0.24	0.22	0.17	0.2	0.17		1.39323e-07	****	1.42712e-10	****
	0.5	0.48	0.58	0.29	0.23	0.45	0.51			0.42	0.38	0.44	0.55	0.53	0.4				4.98952e-05	****	7.55775e-07	****
	1	0.76	0.92	0.46	0.37	0.7	0.8	0.05	0.03	0.56	0.52	0.59	0.75	0.71	0.54	0.55	0.71		0.00537009	**	3.93823e-06	****
	10	0.88	1.06	0.52	0.43	0.81	0.93	1.03	1.12	0.59	0.55	0.63	0.79	0.75	0.57	0.93	0.8		0.324563	ns	0.000160791	***

## Sheet: A152T, 8h Treat.
	Compound treatment, 8 h														T-test relative to Vehicle
	QC-01-175 (μM)	TAU5						S396 P-Tau							TAU5		S396
	0	1	1.2	0.6	0.89	0.92	1.06	1	0.92	1.06	1.32	1.26	0.96
	0.001	0.92	1.11	0.55	0.45	0.85	0.98	0.83	0.76	0.88	1.1	1.04	0.8		0.33535	ns	0.0612278	ns
	0.01	0.86	1.04	0.51	0.42	0.79	0.91	0.87	0.8	0.92	1.15	1.09	0.84		0.169388	ns	0.142713	ns
	0.05	0.56	0.67	0.33	0.27	0.52	0.59	0.45	0.42	0.48	0.6	0.57	0.43		0.00141276	***	1.15489e-05	****
	0.1	0.79	0.56	0.47	0.39	0.73	0.54	0.56	0.51	0.59	0.74	0.7	0.54		0.00544714	**	0.000100211	****
	0.5	0.64	0.77	0.38	0.31	0.59	0.68	0.67	0.62	0.71	0.89	0.85	0.65		0.00595064	**	0.00142433	***
	1	0.54	0.65	0.32	0.26	0.49	0.57	0.71	0.65	0.75	0.64	0.79	0.68		0.000986544	***	0.000320813	***
	10	0.65	0.38	0.39	0.32	0.6	0.49	0.54	0.5	0.57	0.42	0.68	0.52		0.000713912	***	2.88469e-05	****

## Sheet: P301L, 4h Treat.
	Compound treatment, 4 h														T-test relative to Vehicle
	QC-01-175 (μM)	TAU5						S396 P-Tau							TAU5		S396
	0	1	0.95	0.59	0.97	0.72	0.69	1	0.97	0.89	1.02	0.84	1
	0.001	0.96	0.91	0.57	0.45	0.69	0.66	0.58	0.57	0.52	0.59	0.49	0.6		0.31487	ns	4.3683e-07	****
	0.01	0.69	0.65	0.41	0.32	0.49	0.48	0.61	0.59	0.54	0.62	0.51	0.75		0.00648178	**	1.49676e-05	****
	0.05	0.63	0.6	0.37	0.3	0.46	0.44	0.25	0.24	0.22	0.25	0.21	0.45		0.00251313	**	4.67115e-08	****
	0.1	0.28	0.27	0.17	0.13	0.2	0.2	0.89	0.87	0.8	0.91	0.75	0.98		9.82285e-06	****	0.0797644	ns
	0.5	0.91	0.86	0.54	0.43	0.66	0.63	0.83	0.81	0.75	0.85	0.7	0.91		0.182395	ns	0.0064398	**
	1	1.07	1.1	0.76	0.6	0.72	0.88	0.94	0.91	0.84	0.96	0.79	0.89		0.75284	ns	0.128709	ns
	10	1.13	1.07	0.67	0.53	0.82	0.78	0.72	0.7	0.64	0.73	0.6	0.84		0.912231	ns	0.000247589	***

## Sheet: P301L, 8h Treat.
	Compound treatment, 8 h														T-test relative to Vehicle
	QC-01-175 (μM)	TAU5						S396 P-Tau							TAU5		S396
	0	1	0.95	0.59	0.97	0.72	0.69	1	0.97	0.89	1.02	0.84	1
	0.001	0.95	0.9	0.56	0.94	0.68	0.86	0.96	0.94	0.86	0.98	0.81	1.1		0.959595	ns	0.822307	ns
	0.01	0.73	0.79	0.49	0.39	0.6	0.57	0.98	0.66	0.61	0.69	0.97	0.99		0.0367012	*	0.116225	ns
	0.05	0.86	0.82	0.51	0.4	0.62	0.6	0.73	0.71	0.65	0.74	0.61	0.85		0.0981982	ns	0.000339316	***
	0.1	0.86	0.82	0.51	0.41	0.62	0.6	0.61	0.59	0.54	0.62	0.51	0.7		0.0986427	ns	4.34801e-06	****
	0.5	0.47	0.45	0.28	0.22	0.34	0.33	0.41	0.39	0.36	0.41	0.34	0.45		0.000172567	****	1.22918e-08	****
	1	0.31	0.67	0.42	0.33	0.51	0.49	0.46	0.54	0.59	0.47	0.55	0.51		0.00220995	**	2.655e-07	****
	10	0.23	0.6	0.38	0.3	0.46	0.44	0.71	0.69	0.63	0.72	0.7	0.75		0.000821717	****	1.98732e-05	****
