# Supplementary material for: Targeted degradation of aberrant tau in frontotemporal dementia patient-derived neuronal cell models
Source: eLife journal article supplement (doi:10.7554/elife.45457), 2019-03-25
Supplement: supp [file elife-45457-supp-v1.zip › elife_poa_e45457_Figure_7_source_data_1.xlsx]

## Sheet: Amyloid-beta dose curves(A.)
	Viability (% relative to Vehicle-treated)
Aβ(1-42) (μM)	Non-mutant																														Tau-A152T
0	100	100	100	100	100	100	100	100	100	100	100	100	100	100	100	100	100	100	100	100	100	100	100	100	100	100	100	100	100	100	100	100	100	84	100	99	100	89	100	100	100	100	100	100	100	100	100	100	100
0.8	100	100	100	100	100	100	100	100	100	100	100	100	100	100																	100	100	100	100	100	101	100	100	100	100	99	100	100	97	101	105
1.3	72.7772	100.464	102.959	104.035	99.1	92.9	98	81	114	81	97.6433	99.0678	93.7552	92.5946	90.9608	80.548	92.9118	81.3325	100.129	108.467	100.1	108.5									92.4979	97.7976	92.0124	89.9065	98.3399	71.4893	71.6329	81.0278	92.5	97.8	92	89.9	58	71	72	61
2.5	73.1825	100.052	103.532	104.614	94.6	90.3	97	95	100	96	96.5487	94.6295	93.4171	92.2607	90.2881	94.8653	100	96.0125	93.0425	102.432	93	102.4									100.361	72.7208	95.2243	81.5333	53.4472	67.9883	70.8501	60.7636	100.4	72.7	95.2	81.5	53	68	71	61
5	95.5	95.5	83.6	104.7	76	81	75.4	73.5061	102.521	103.99	105.076	103.553	95.5	95.5	99.4175	98.1868	91.5258	99.6183	102.349	83.1266	72.1873	87	81.6	104	92	100	102	83.1	72.2		69.9	57.8	40.1	58	53.5	63.8096	75.6784	69.9	57.8	72.8665	70.8456	59.0065	62.0941	68.3994	63.8439	63.8	75.7	72.9	70.8
10	70.9	101.4	59.9	83.7	104.2	101.1	106.7	121.6	87.3	84.7	99.8	113.8	113.005	84.9203	101.4	75.8623	83.7	92.7988	100.305	95.0608	72.3248	88.8246	87.1291	88.0397	84.9	75.9	113	93	116	95	34	57.2	64	54	70	55	70	56	45.901	66.7538	34	57.2	52.723	46.9993	60.7801	60.9423	84.0272	52.0658	45.9
20	76.3	62.5	92.4	74.9	76	81	75.4	76.3	82.5	100.889	76.3	62.5	92.4	49.7895	83.5704	100.646	87.9472	68.4749	70.478	48.3	49.8	120	84	118	110.686	110.686	99.5	99.5	100.4	100.4	8.8	23.6	8.8	33.6	6.6	35	8.7	11.9	6.65892	15.8605	8.8	33.6	8.9599	6.59362	55.1134	33.4406	68.3994	32.9942	8.7
30	55.797	80.8576	78.9365	79.7615	97.6352	96.4266	94.7253	69.8386	91.6352	90.4266	88.7253	59.797	84.8576	82.9365	83.7615																28	23	53	42	44	35	30	21.5	59.1	40	26.9	32.7	50	46	39	54	43
[truncated: 42 more columns]

## Sheet: Stress Rescue(C.)
		% Viability (Relative to Vehicle)							T-Test		T-Test
		I	II	III	IV	V	VI		relative to Vehicle		relative to Aβ(1-42)
	Vehicle	87.31	103.76	98.13	102.57	104.15	104.07
	5μM QC-01-175	78.54	107.2	115.77	105.04	96.67	93.61		0.93101	ns
	5μM QC-03-075	103.76	98.13	102.57	105.04	96.67	93.61		0.991668	ns
	MAPT-Kd	102.1	94.6	103.9	91.5	93.1	88.5		0.260398	ns
	10 μM Aβ(1-42)	32.27	63.55	47.61	44.07	39.05	60.78		3.47134e-06	***
	QC-01-175 + Aβ(1-42)	68.8	91.97	79.39	85.46	97.18	101.09		0.0465985	*	0.000215381	***
	QC-03-075 + Aβ(1-42)	34.88	49.39	70.39	61.68	48.28	62.49		1.57662e-05	***	0.380374	ns
	MAPT-Kd + Aβ(1-42)	91.5	100.2	94	106.1	100.6	105.9		0.93998	ns	3.02872e-06	***
