# Supplementary figures and images for: Targeted degradation of aberrant tau in frontotemporal dementia patient-derived neuronal cell models
Source: eLife journal article supplement (doi:10.7554/elife.45457), 2019-03-25

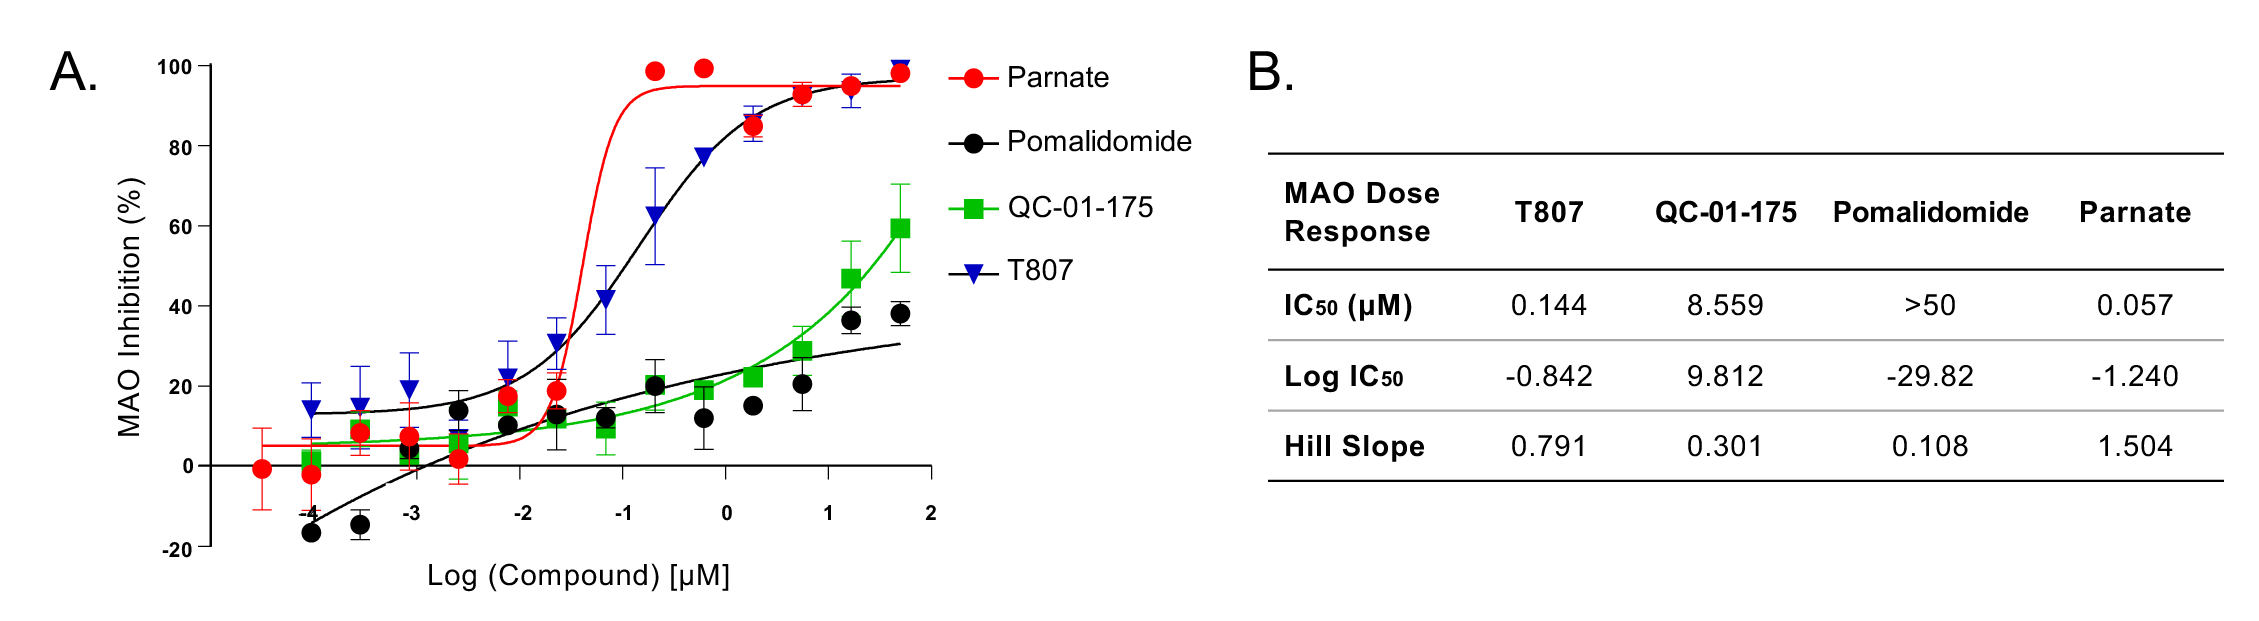

Supplement: supp [file elife-45457-supp-v1.zip › elife_poa_e45457_Figure_1_figure_supplement_2.tif]

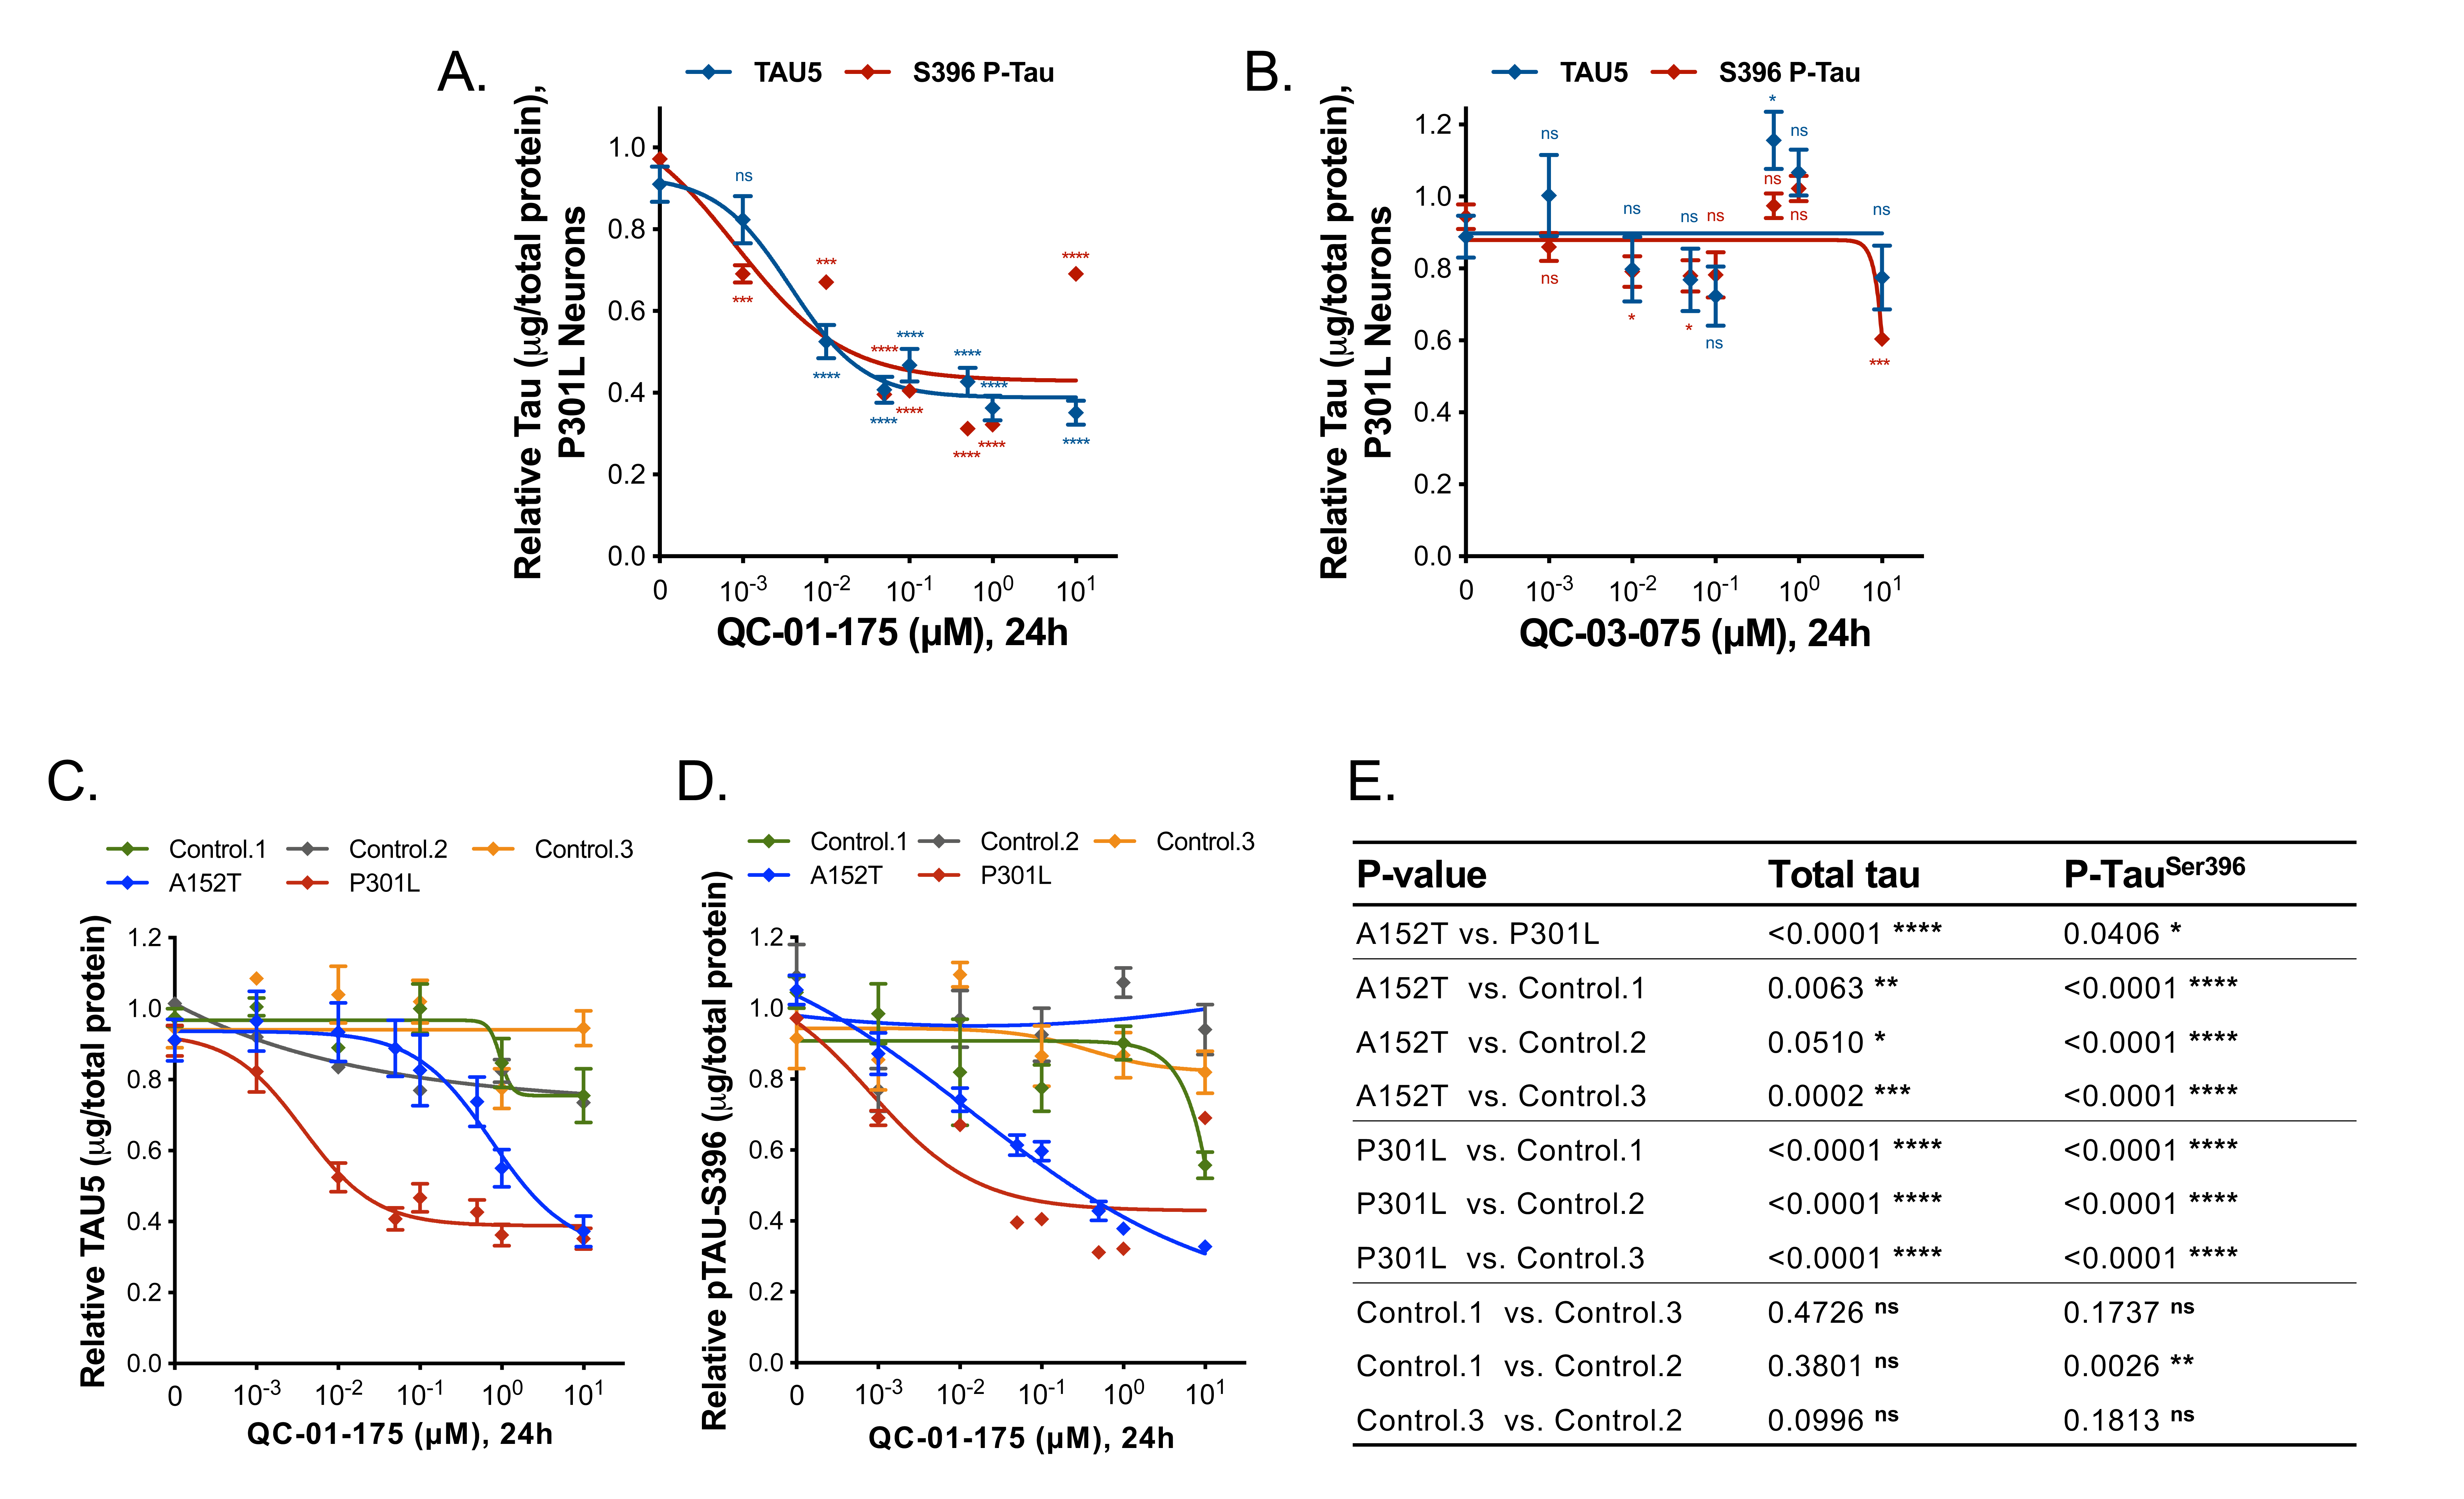

Supplement: supp [file elife-45457-supp-v1.zip › elife_poa_e45457_Figure_2_figure_supplement_2.tif]

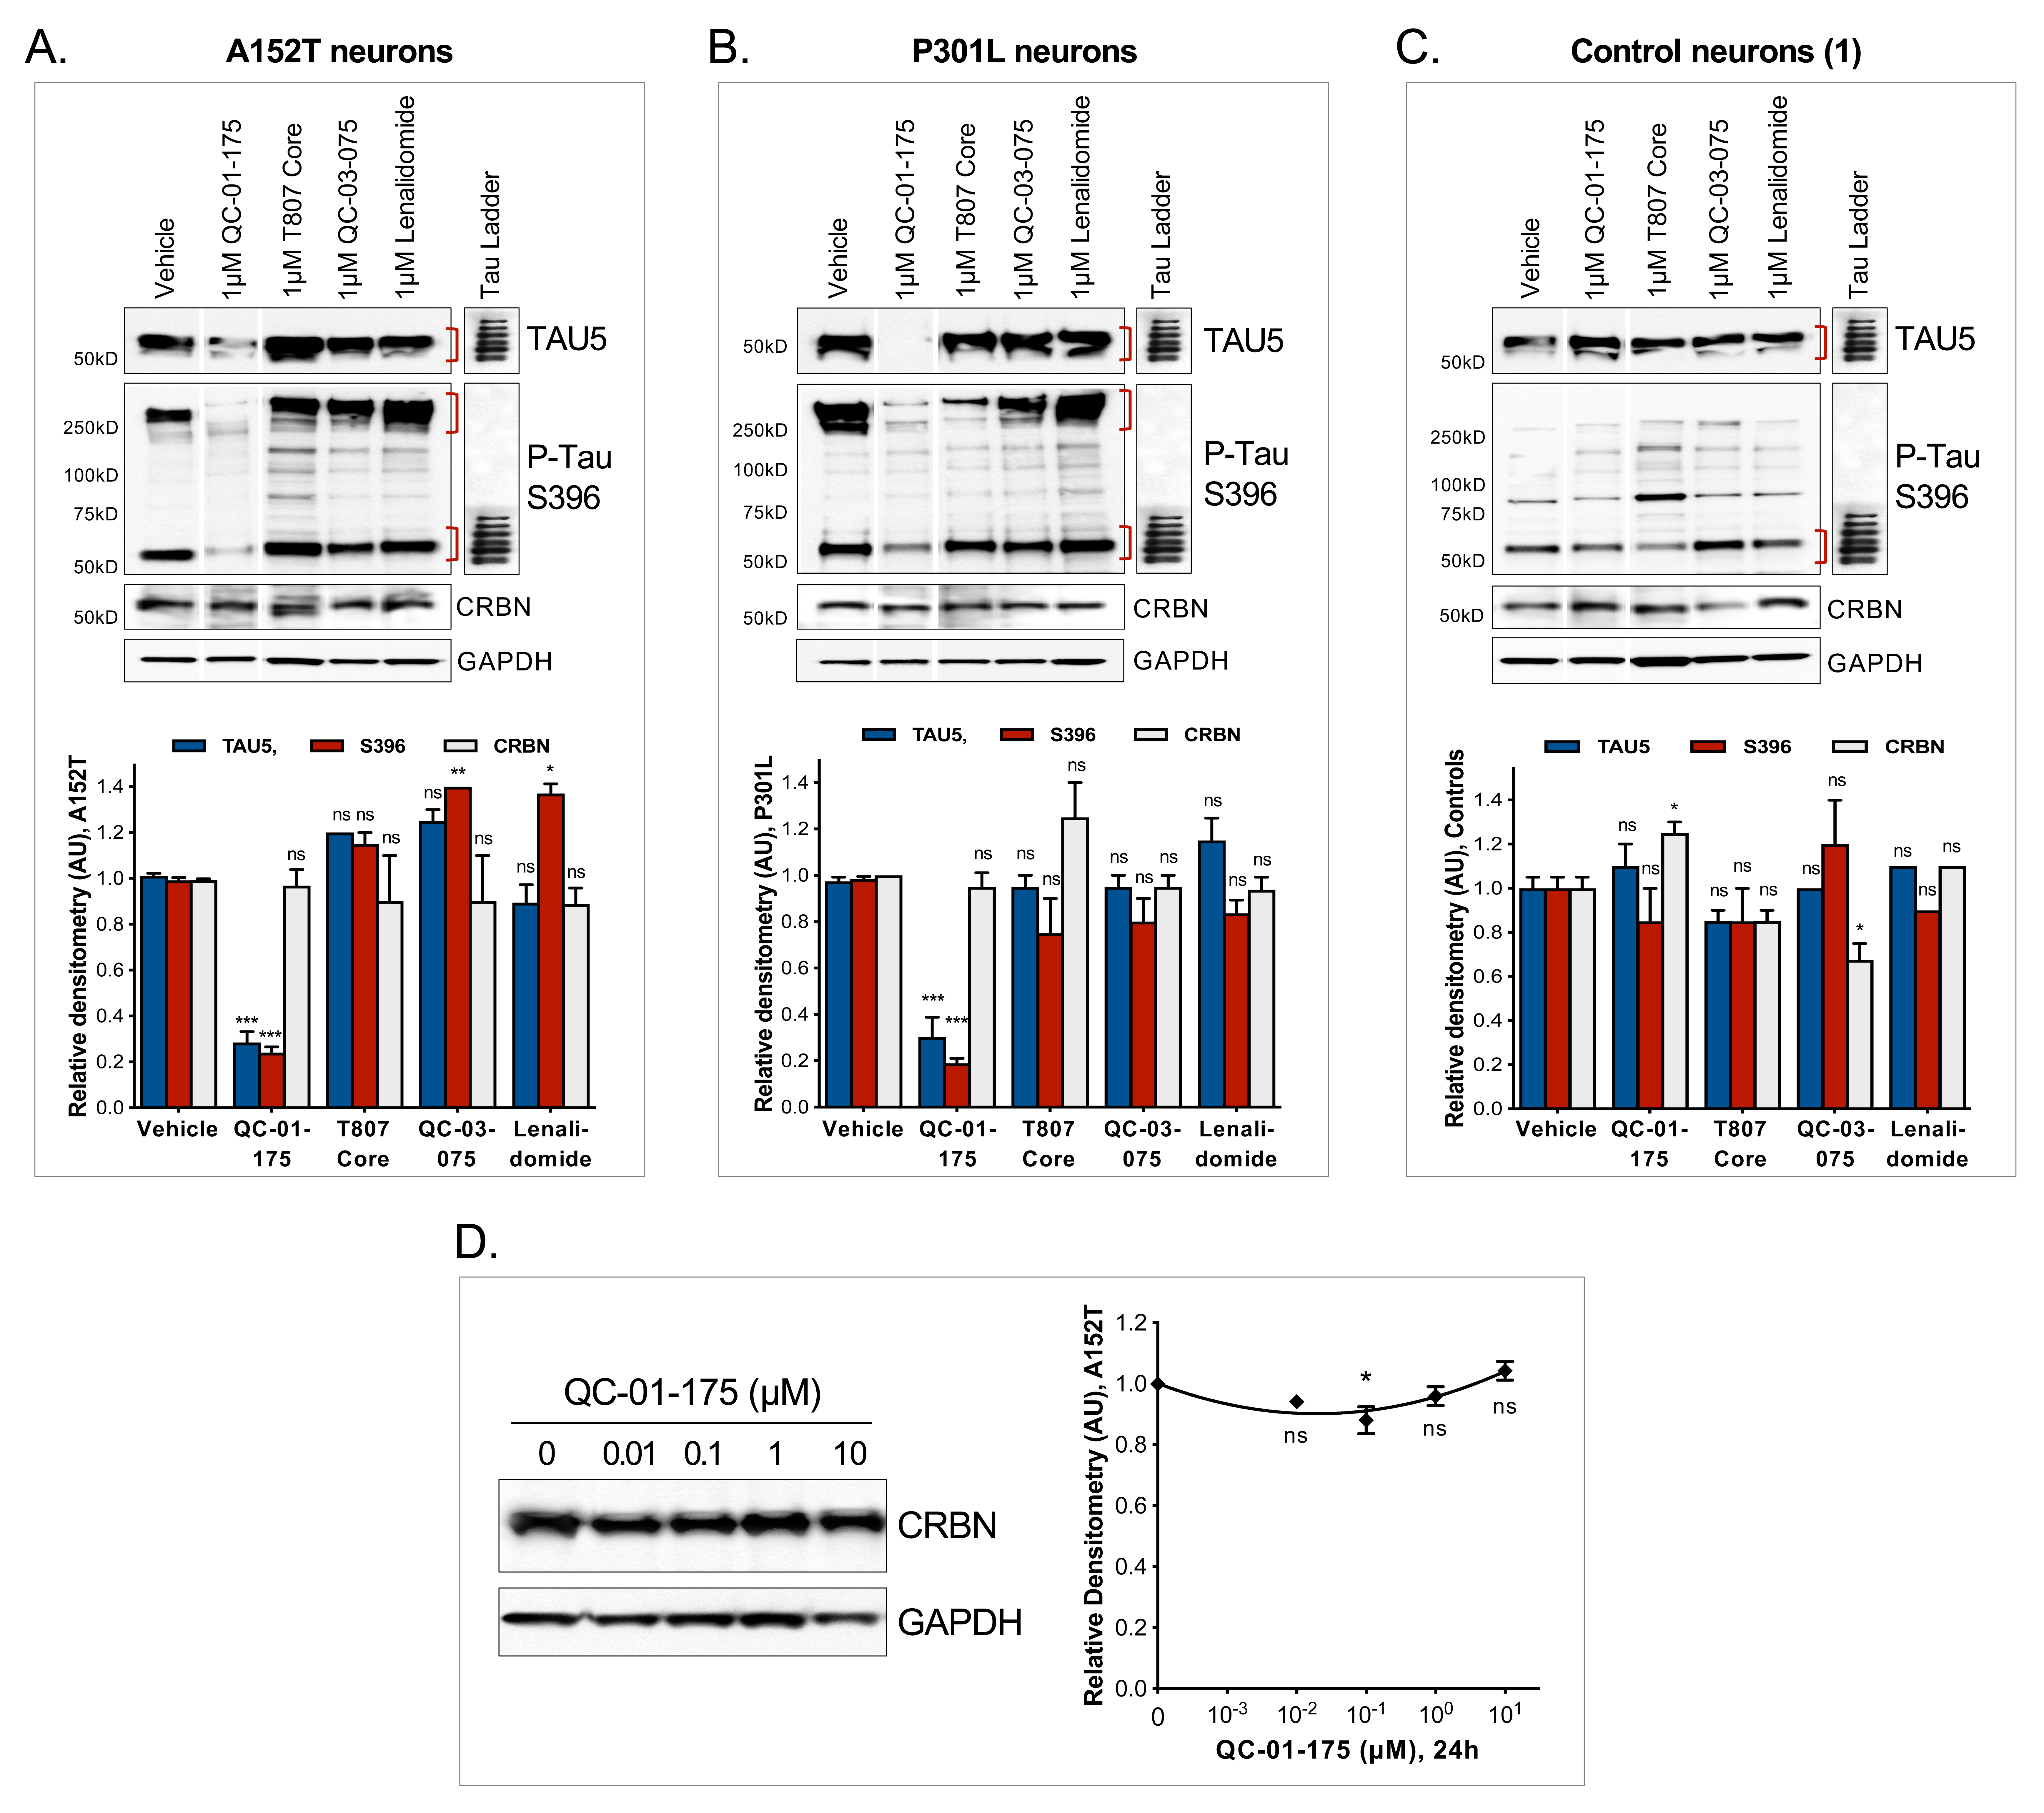

Supplement: supp [file elife-45457-supp-v1.zip › elife_poa_e45457_Figure_3_figure_supplement_1.tif]

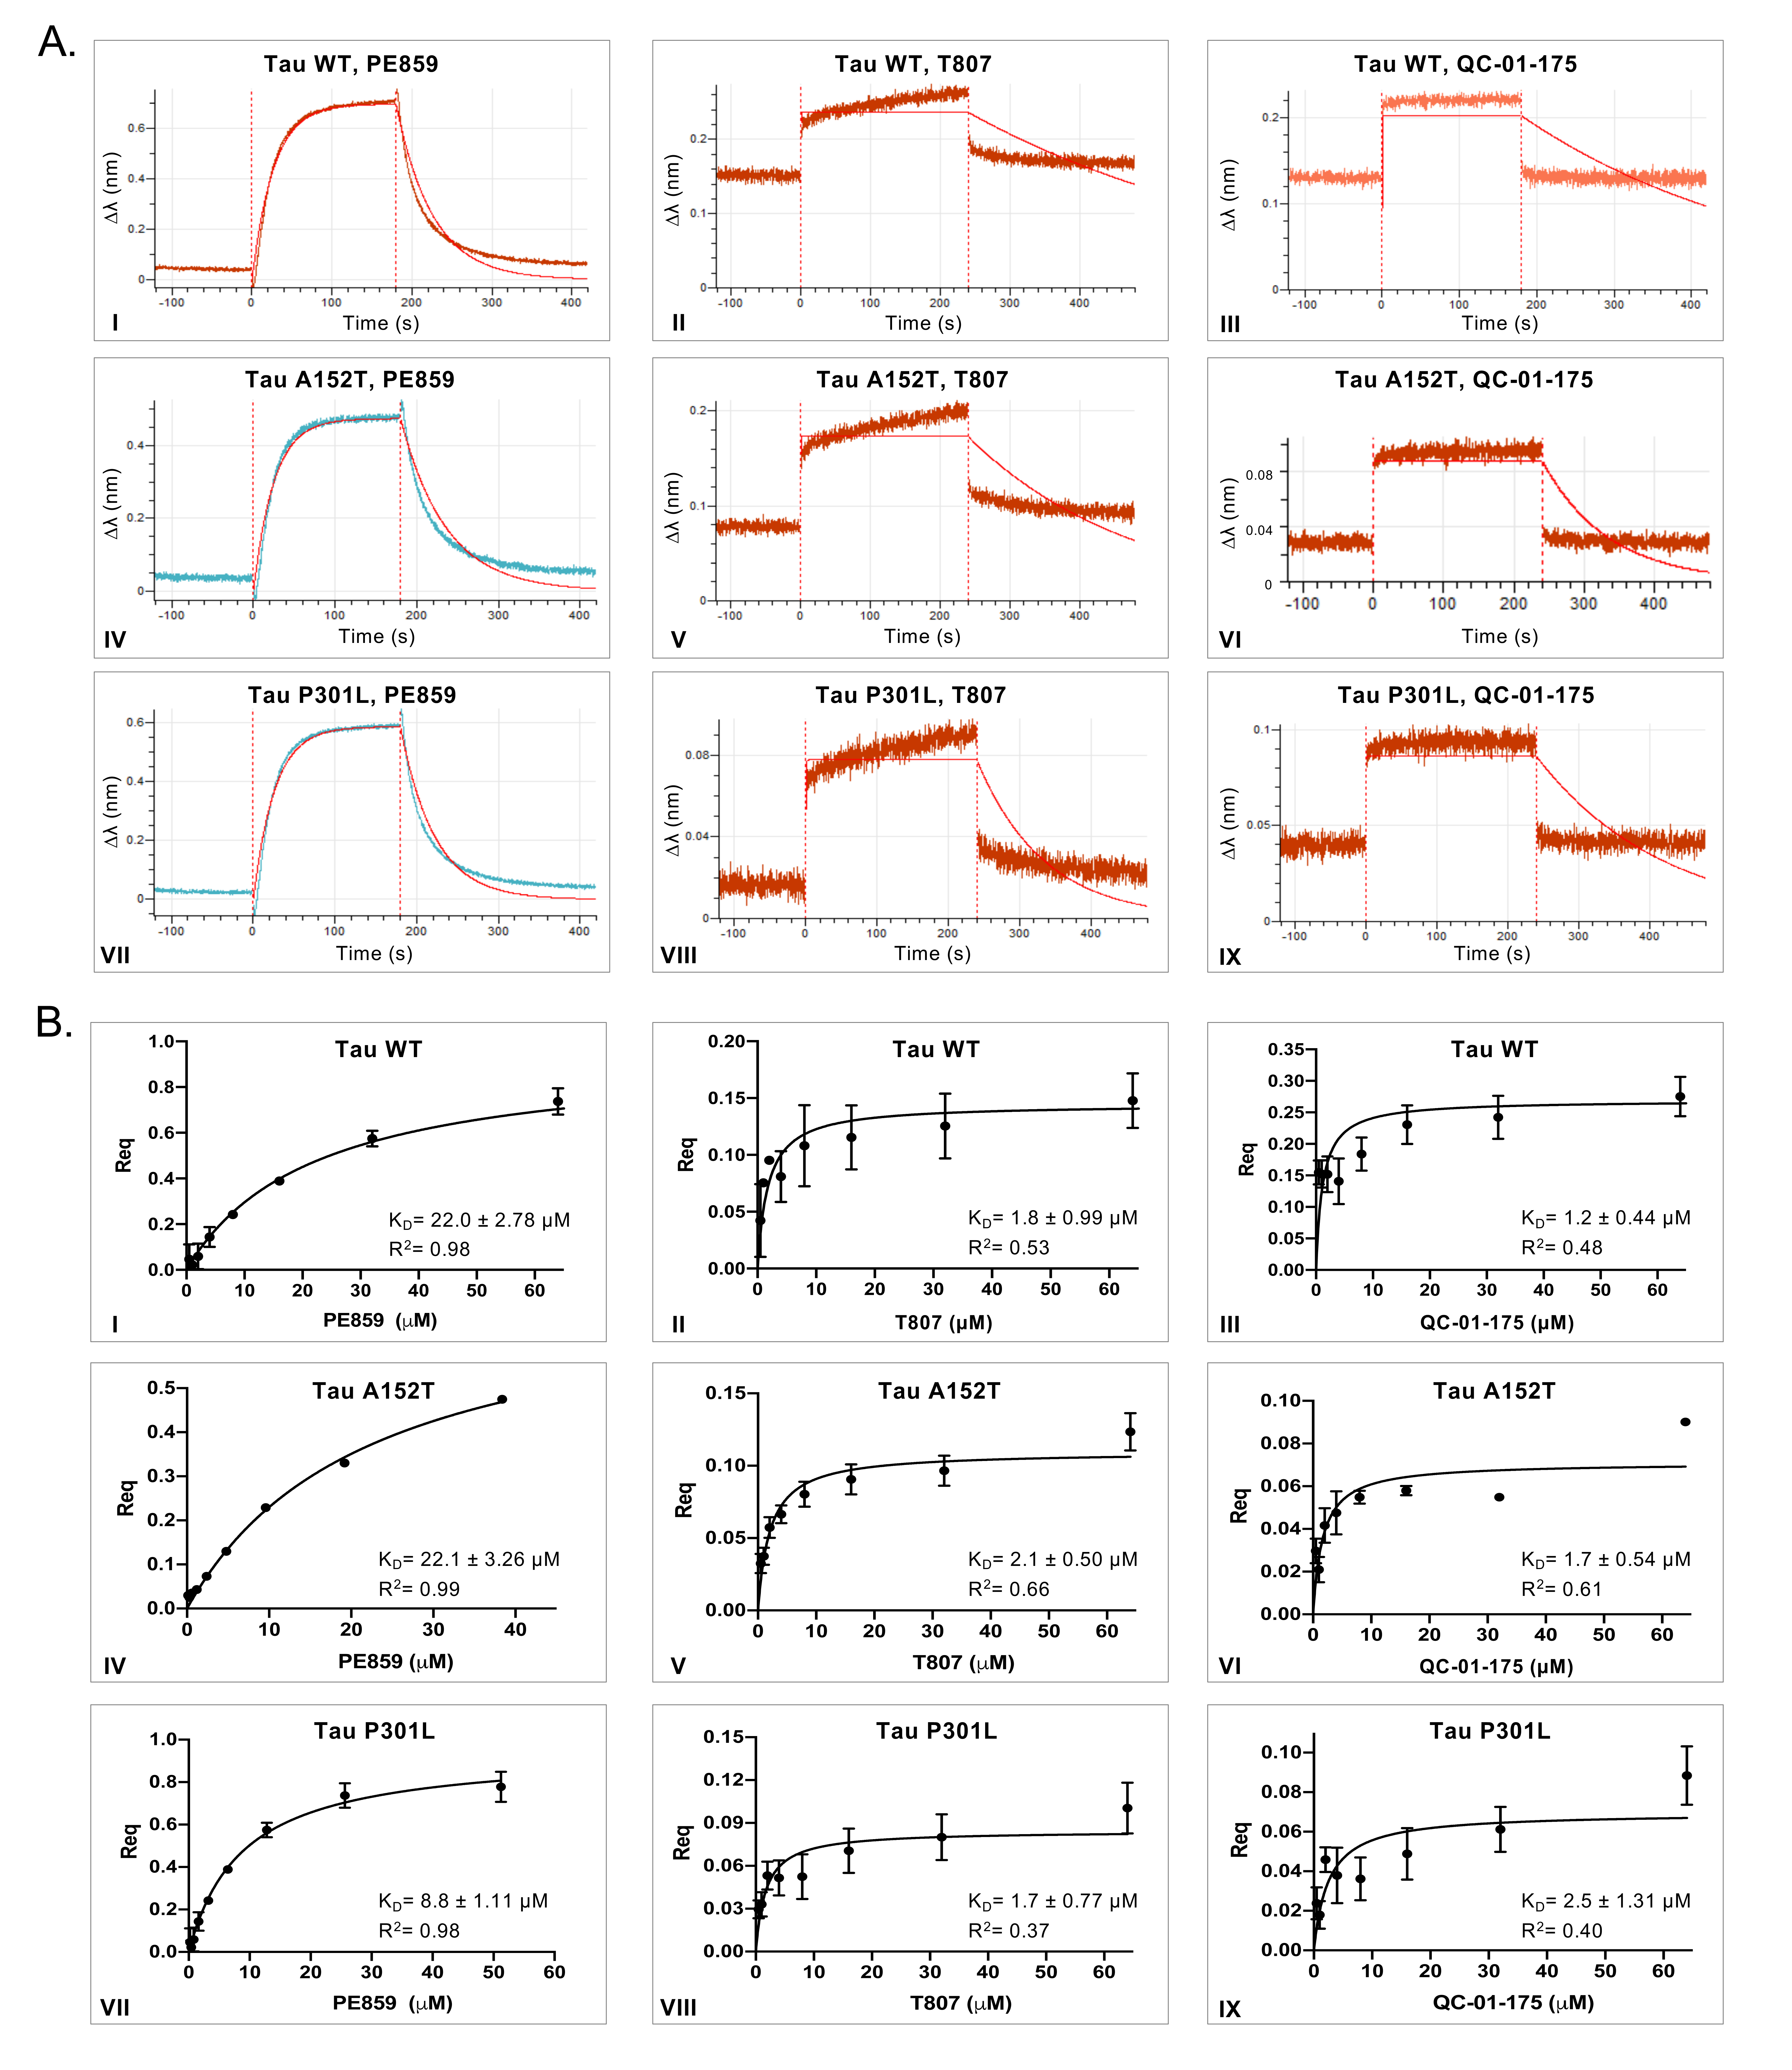

Supplement: supp [file elife-45457-supp-v1.zip › elife_poa_e45457_Figure_1_figure_supplement_1.tif]

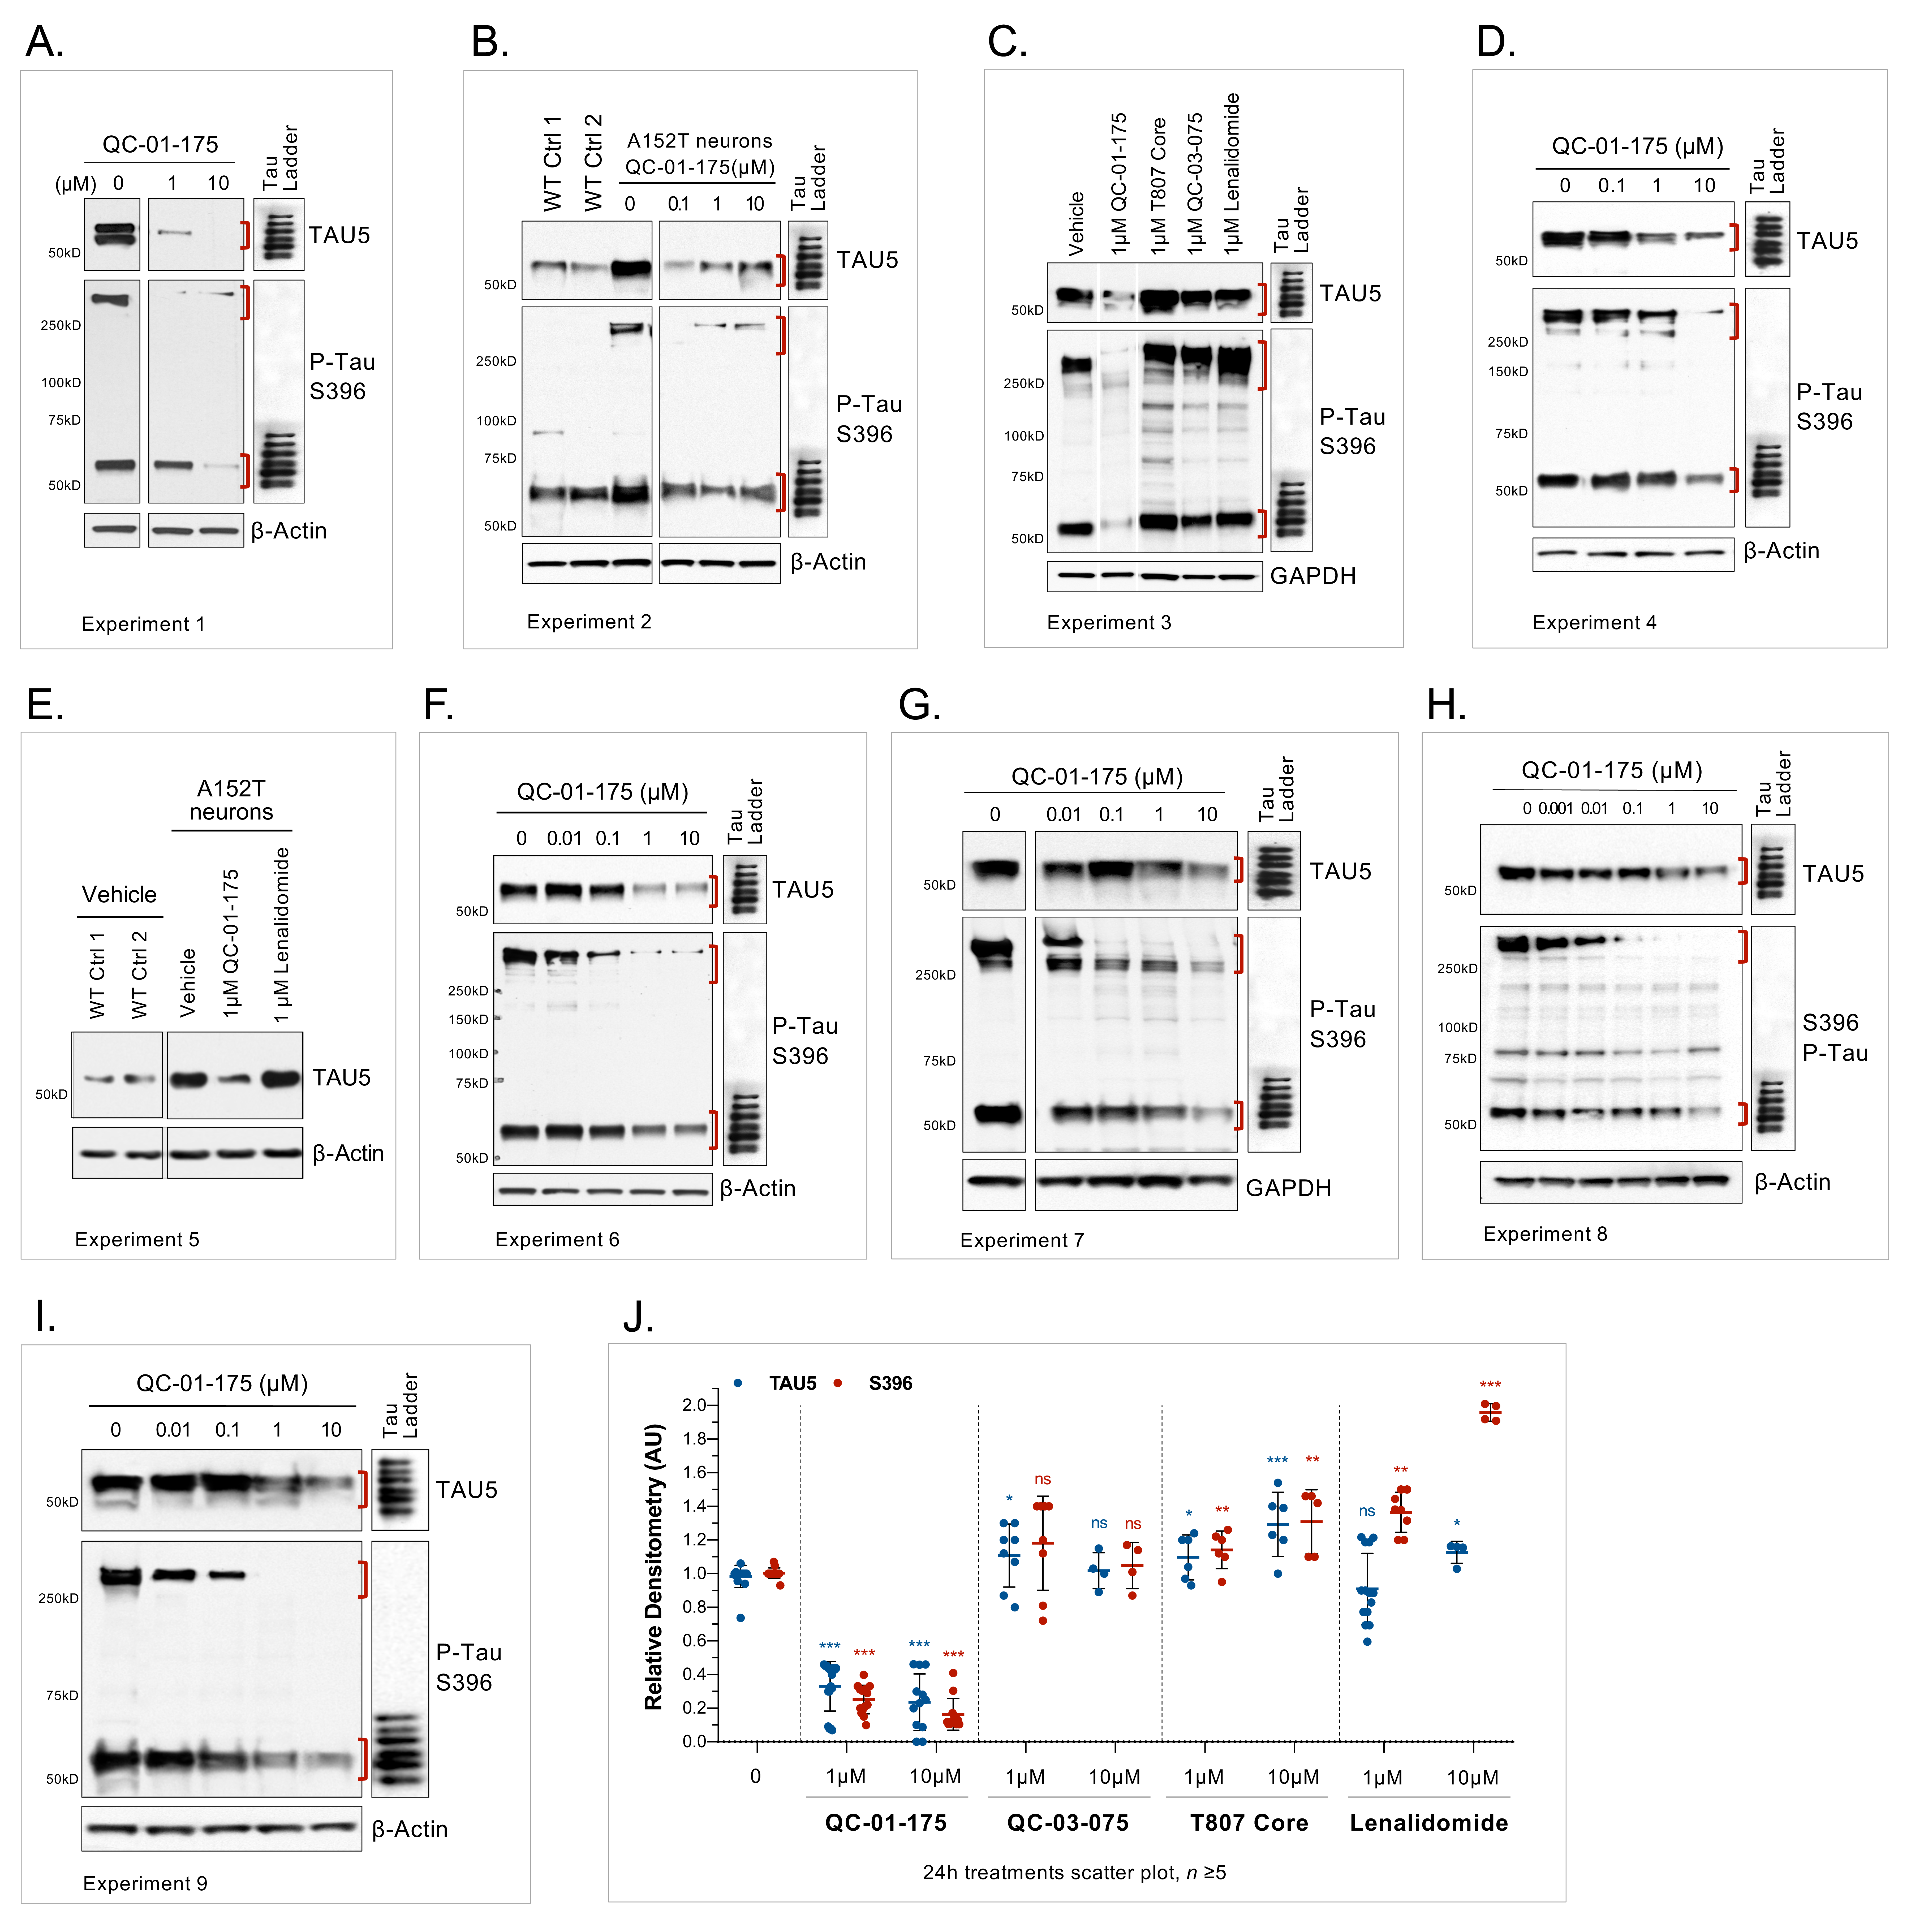

Supplement: supp [file elife-45457-supp-v1.zip › elife_poa_e45457_Figure_2_figure_supplement_1.tif]

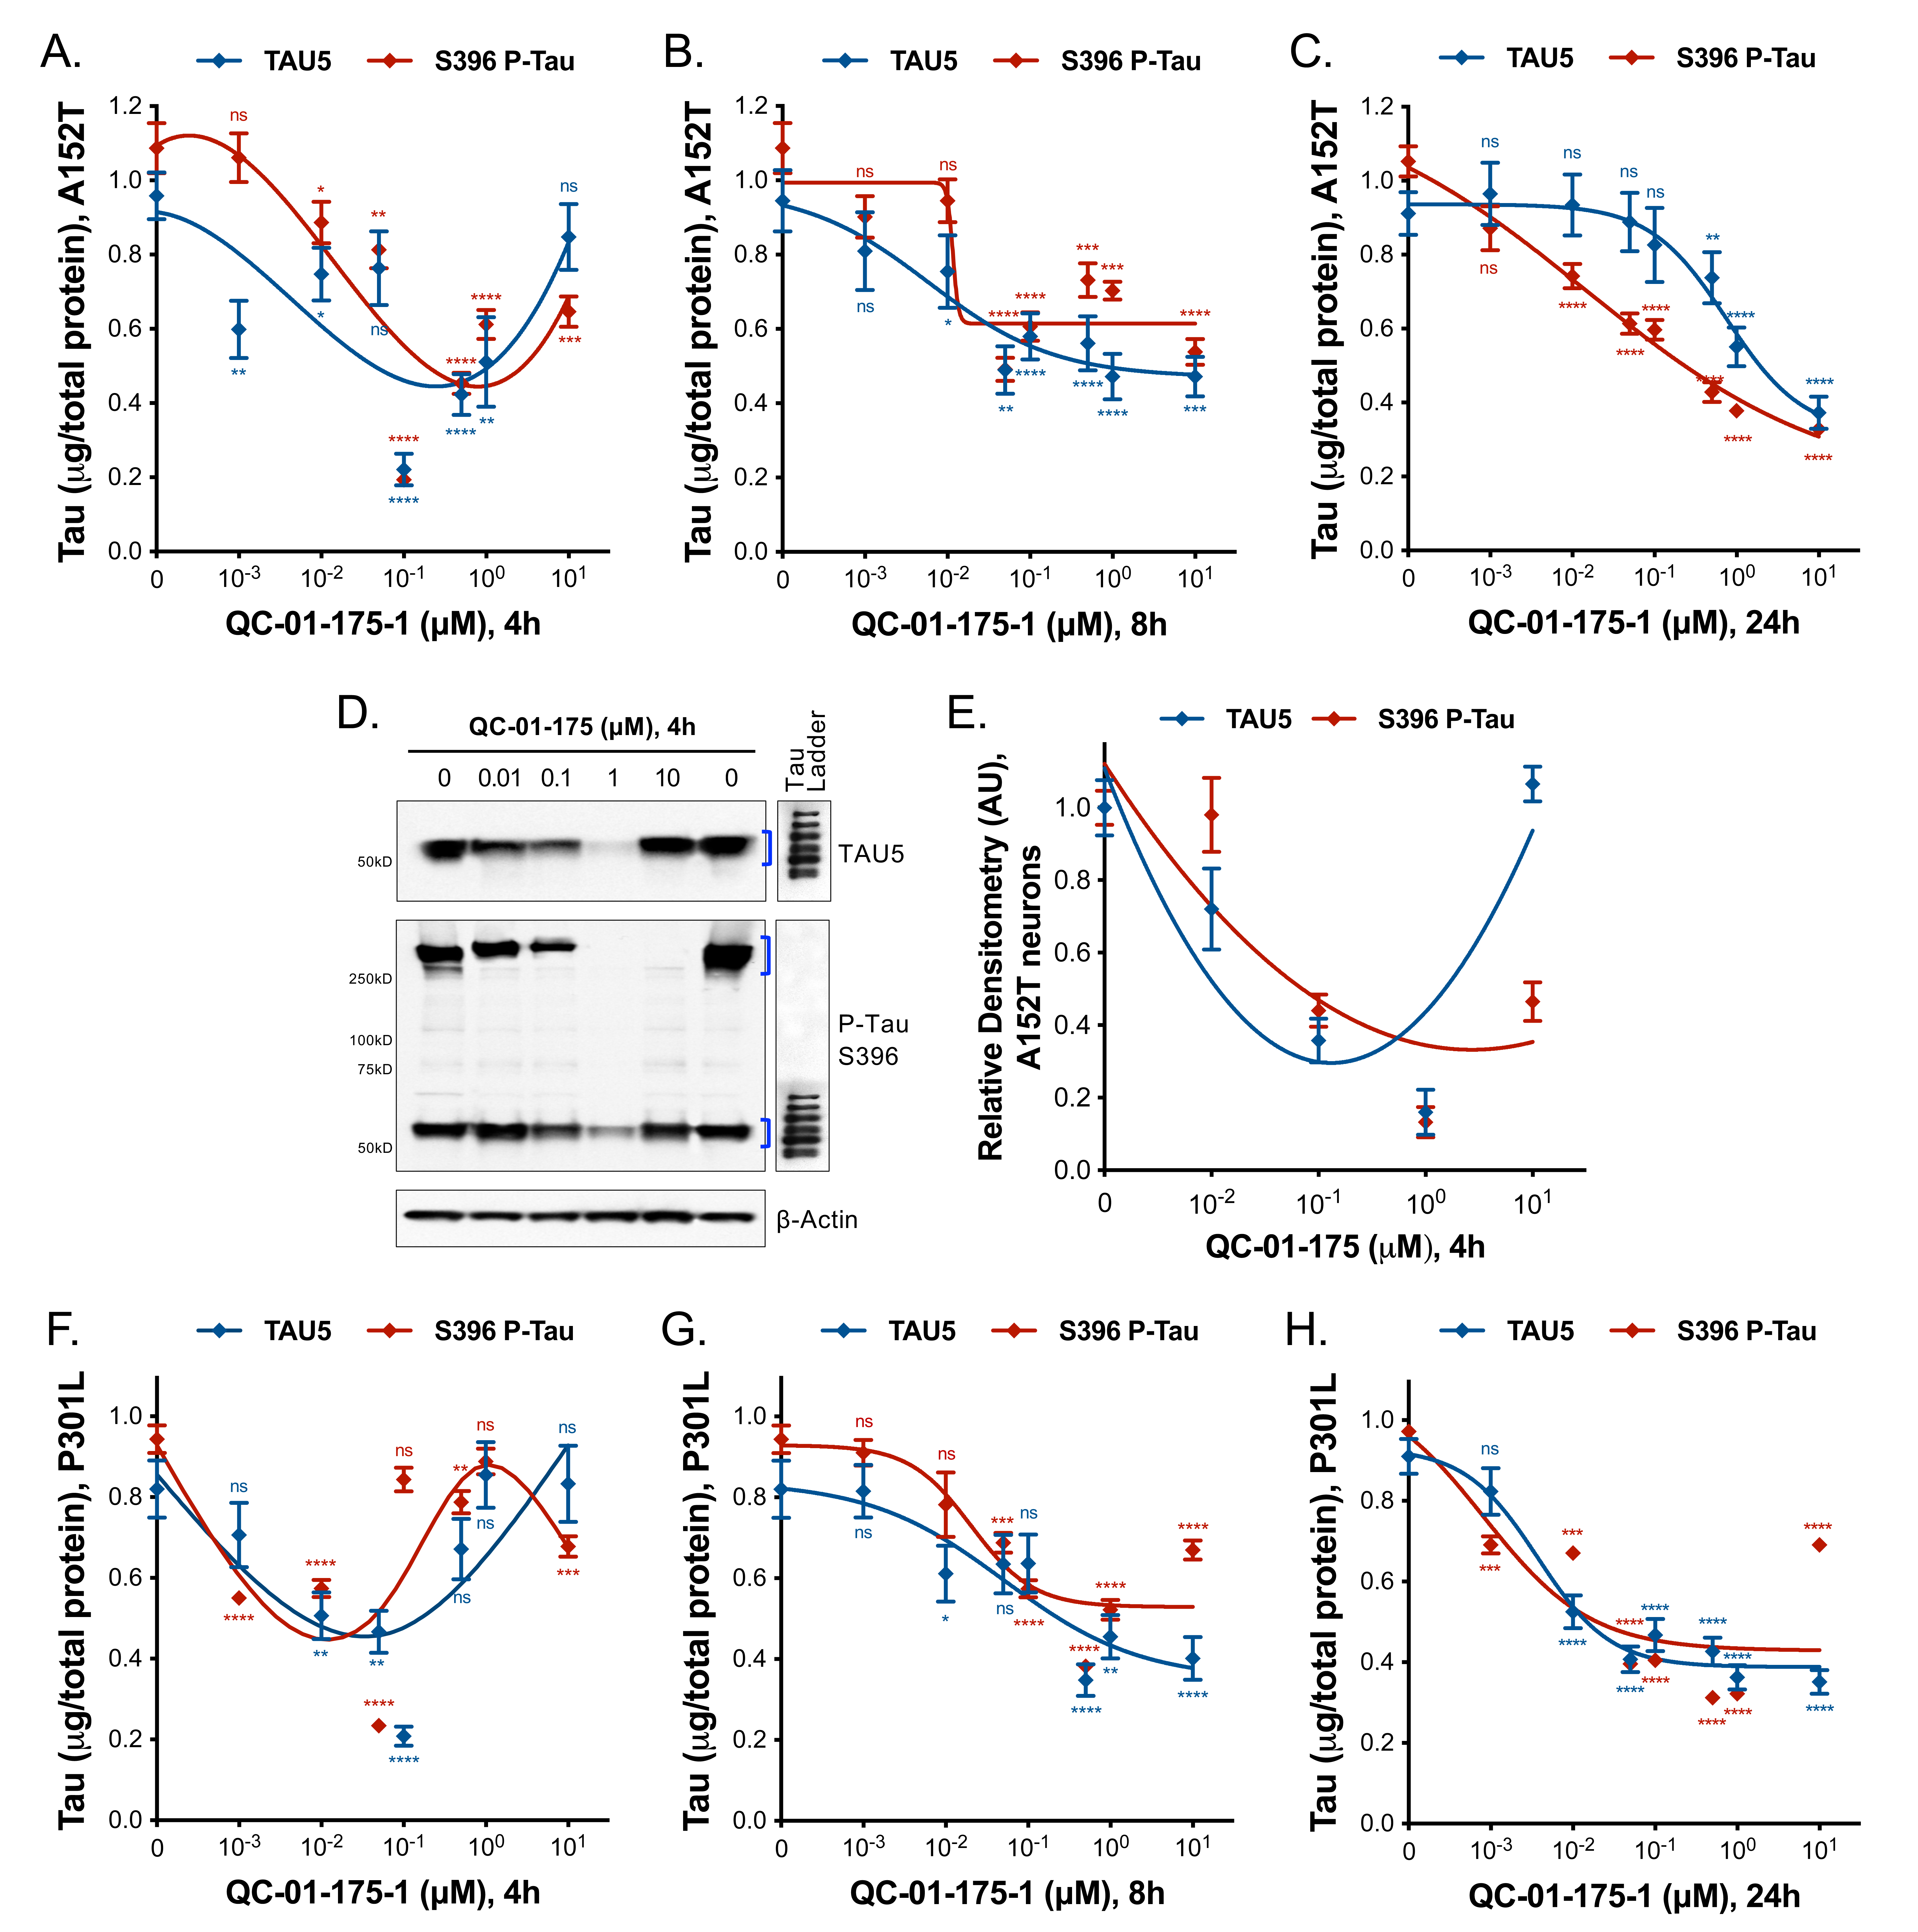

Supplement: supp [file elife-45457-supp-v1.zip › elife_poa_e45457_Figure_5_figure_supplement_1.tif]
